# Supplementary material for: Poor Sensitivity of the MALDI Biotyper® MBT Subtyping Module for Detection of Klebsiella pneumoniae Carbapenemase (KPC) in Klebsiella Species
Source: MDPI journal article supplement (doi:10.3390/antibiotics12091465), 2023-09-20
Supplement: s1 [file s1]

**Table S1.** Results of WGS and MALDI-ToF detection in 795 *Klebsiella* isolates.

| ISOLATE   | KPC<br>PRESENCE by<br>WHOLE<br>GENOME<br>SEQUENCING | KPC<br>TYPE | pKpQIL_019<br>STATUS by<br>WHOLE<br>GENOME<br>SEQUENCING | SUBTYPING<br>MODULE<br>IDENTIFICA-<br>TION | SPECIES IDENTIFICATION        |                                   | REGION<br>* | RESHOOT of<br>DISCREPANT<br>/ NOT<br>DETECTED<br>ISOLATE | RESULT of<br>RESHOOT<br>** |
|-----------|-----------------------------------------------------|-------------|----------------------------------------------------------|--------------------------------------------|-------------------------------|-----------------------------------|-------------|----------------------------------------------------------|----------------------------|
|           |                                                     |             |                                                          |                                            | WHOLE<br>GENOME<br>SEQUENCING | MALDI-ToF<br>MASS<br>SPECTROMETRY |             |                                                          |                            |
| ARLG-7444 | No                                                  | N/A         | NO                                                       | Negative                                   | <i>K. pneumoniae</i>          | <i>K. pneumoniae</i>              | 2           | NO                                                       | N/A                        |
| ARLG-7309 | No                                                  | N/A         | NO                                                       | Negative                                   | <i>K. pneumoniae</i>          | <i>K. pneumoniae</i>              | 3           | NO                                                       | N/A                        |
| ARLG-7314 | No                                                  | N/A         | NO                                                       | Negative                                   | <i>K. pneumoniae</i>          | <i>K. pneumoniae</i>              | 3           | NO                                                       | N/A                        |
| ARLG-7316 | No                                                  | N/A         | NO                                                       | Negative                                   | <i>K. pneumoniae</i>          | <i>K. pneumoniae</i>              | 3           | NO                                                       | N/A                        |
| ARLG-7317 | No                                                  | N/A         | NO                                                       | Negative                                   | <i>K. pneumoniae</i>          | <i>K. pneumoniae</i>              | 3           | NO                                                       | N/A                        |
| ARLG-7318 | No                                                  | N/A         | NO                                                       | Negative                                   | <i>K. pneumoniae</i>          | <i>K. pneumoniae</i>              | 3           | NO                                                       | N/A                        |
| ARLG-7319 | No                                                  | N/A         | NO                                                       | Negative                                   | <i>K. pneumoniae</i>          | <i>K. pneumoniae</i>              | 3           | NO                                                       | N/A                        |
| ARLG-7321 | No                                                  | N/A         | NO                                                       | Negative                                   | <i>K. pneumoniae</i>          | <i>K. pneumoniae</i>              | 3           | NO                                                       | N/A                        |
| ARLG-7322 | No                                                  | N/A         | NO                                                       | Negative                                   | <i>K. pneumoniae</i>          | <i>K. pneumoniae</i>              | 3           | NO                                                       | N/A                        |
| ARLG-7323 | No                                                  | N/A         | NO                                                       | Negative                                   | <i>K. pneumoniae</i>          | <i>K. pneumoniae</i>              | 3           | NO                                                       | N/A                        |
| ARLG-7325 | No                                                  | N/A         | NO                                                       | Negative                                   | <i>K. pneumoniae</i>          | <i>K. pneumoniae</i>              | 3           | NO                                                       | N/A                        |
| ARLG-7326 | No                                                  | N/A         | NO                                                       | Negative                                   | <i>K. pneumoniae</i>          | <i>K. pneumoniae</i>              | 3           | NO                                                       | N/A                        |
| ARLG-7327 | No                                                  | N/A         | NO                                                       | Negative                                   | <i>K. pneumoniae</i>          | <i>K. pneumoniae</i>              | 3           | NO                                                       | N/A                        |
| ARLG-7331 | No                                                  | N/A         | NO                                                       | Negative                                   | <i>K. pneumoniae</i>          | <i>K. pneumoniae</i>              | 3           | NO                                                       | N/A                        |
| ARLG-7332 | No                                                  | N/A         | NO                                                       | Negative                                   | <i>K. pneumoniae</i>          | <i>K. pneumoniae</i>              | 3           | NO                                                       | N/A                        |
| ARLG-7333 | No                                                  | N/A         | NO                                                       | Negative                                   | <i>K. pneumoniae</i>          | <i>K. pneumoniae</i>              | 3           | NO                                                       | N/A                        |
| ARLG-7334 | No                                                  | N/A         | NO                                                       | Negative                                   | <i>K. pneumoniae</i>          | <i>K. pneumoniae</i>              | 3           | NO                                                       | N/A                        |
| ARLG-7335 | No                                                  | N/A         | NO                                                       | Negative                                   | <i>K. pneumoniae</i>          | <i>K. pneumoniae</i>              | 3           | NO                                                       | N/A                        |
| ARLG-7336 | No                                                  | N/A         | NO                                                       | Negative                                   | <i>K. pneumoniae</i>          | <i>K. pneumoniae</i>              | 3           | NO                                                       | N/A                        |
| ARLG-7337 | No                                                  | N/A         | NO                                                       | Negative                                   | <i>K. pneumoniae</i>          | <i>K. pneumoniae</i>              | 3           | NO                                                       | N/A                        |
| ARLG-7338 | No                                                  | N/A         | NO                                                       | Negative                                   | <i>K. pneumoniae</i>          | <i>K. pneumoniae</i>              | 3           | NO                                                       | N/A                        |
| ARLG-7339 | No                                                  | N/A         | NO                                                       | Negative                                   | <i>K. pneumoniae</i>          | <i>K. pneumoniae</i>              | 3           | NO                                                       | N/A                        |
| ARLG-7340 | No                                                  | N/A         | NO                                                       | Negative                                   | <i>K. pneumoniae</i>          | <i>K. pneumoniae</i>              | 3           | NO                                                       | N/A                        |
| ARLG-7341 | No                                                  | N/A         | NO                                                       | Negative                                   | <i>K. pneumoniae</i>          | <i>K. pneumoniae</i>              | 3           | NO                                                       | N/A                        |

|           |     |      |    |          |                      |                      |   |    |     |
|-----------|-----|------|----|----------|----------------------|----------------------|---|----|-----|
| ARLG-7343 | No  | N/A  | NO | Negative | <i>K. pneumoniae</i> | <i>K. pneumoniae</i> | 3 | NO | N/A |
| ARLG-7344 | No  | N/A  | NO | Negative | <i>K. pneumoniae</i> | <i>K. pneumoniae</i> | 3 | NO | N/A |
| ARLG-7345 | No  | N/A  | NO | Negative | <i>K. pneumoniae</i> | <i>K. pneumoniae</i> | 3 | NO | N/A |
| ARLG-7346 | No  | N/A  | NO | Negative | <i>K. pneumoniae</i> | <i>K. pneumoniae</i> | 3 | NO | N/A |
| ARLG-7347 | No  | N/A  | NO | Negative | <i>K. pneumoniae</i> | <i>K. pneumoniae</i> | 3 | NO | N/A |
| ARLG-7245 | No  | N/A  | NO | Negative | <i>K. pneumoniae</i> | <i>K. pneumoniae</i> | 2 | NO | N/A |
| ARLG-7246 | No  | N/A  | NO | Negative | <i>K. pneumoniae</i> | <i>K. pneumoniae</i> | 2 | NO | N/A |
| ARLG-7504 | No  | N/A  | NO | Negative | <i>K. pneumoniae</i> | <i>K. pneumoniae</i> | 2 | NO | N/A |
| ARLG-7348 | No  | N/A  | NO | Negative | <i>K. pneumoniae</i> | <i>K. pneumoniae</i> | 3 | NO | N/A |
| ARLG-7349 | No  | N/A  | NO | Negative | <i>K. pneumoniae</i> | <i>K. pneumoniae</i> | 3 | NO | N/A |
| ARLG-7350 | No  | N/A  | NO | Negative | <i>K. pneumoniae</i> | <i>K. pneumoniae</i> | 3 | NO | N/A |
| ARLG-7353 | No  | N/A  | NO | Negative | <i>K. pneumoniae</i> | <i>K. pneumoniae</i> | 3 | NO | N/A |
| ARLG-7356 | No  | N/A  | NO | Negative | <i>K. pneumoniae</i> | <i>K. pneumoniae</i> | 3 | NO | N/A |
| ARLG-7359 | No  | N/A  | NO | Negative | <i>K. pneumoniae</i> | <i>K. pneumoniae</i> | 3 | NO | N/A |
| ARLG-7360 | No  | N/A  | NO | Negative | <i>K. pneumoniae</i> | <i>K. pneumoniae</i> | 3 | NO | N/A |
| ARLG-7342 | No  | N/A  | NO | Negative | <i>K. pneumoniae</i> | <i>K. pneumoniae</i> | 3 | NO | N/A |
| ARLG-7354 | No  | N/A  | NO | Negative | <i>K. pneumoniae</i> | <i>K. pneumoniae</i> | 3 | NO | N/A |
| ARLG-7228 | Yes | KPC2 | NO | Negative | <i>K. pneumoniae</i> | <i>K. pneumoniae</i> | 2 | NO | N/A |
| ARLG-7440 | No  | N/A  | NO | Negative | <i>K. pneumoniae</i> | <i>K. pneumoniae</i> | 2 | NO | N/A |
| ARLG-7683 | No  | N/A  | NO | Negative | <i>K. pneumoniae</i> | <i>K. pneumoniae</i> | 1 | NO | N/A |
| ARLG-7612 | No  | N/A  | NO | Negative | <i>K. pneumoniae</i> | <i>K. pneumoniae</i> | 1 | NO | N/A |
| ARLG-8110 | No  | N/A  | NO | Negative | <i>K. pneumoniae</i> | <i>K. pneumoniae</i> | 1 | NO | N/A |
| ARLG-7687 | No  | N/A  | NO | Negative | <i>K. pneumoniae</i> | <i>K. pneumoniae</i> | 1 | NO | N/A |
| ARLG-7568 | No  | N/A  | NO | Negative | <i>K. pneumoniae</i> | <i>K. pneumoniae</i> | 1 | NO | N/A |
| ARLG-7794 | Yes | KPC2 | NO | Negative | <i>K. pneumoniae</i> | <i>K. pneumoniae</i> | 1 | NO | N/A |
| ARLG-7533 | No  | N/A  | NO | Negative | <i>K. pneumoniae</i> | <i>K. pneumoniae</i> | 1 | NO | N/A |
| ARLG-8120 | No  | N/A  | NO | Negative | <i>K. pneumoniae</i> | <i>K. pneumoniae</i> | 1 | NO | N/A |
| ARLG-8122 | No  | N/A  | NO | Negative | <i>K. pneumoniae</i> | <i>K. pneumoniae</i> | 1 | NO | N/A |
| ARLG-8034 | No  | N/A  | NO | Negative | <i>K. pneumoniae</i> | <i>K. pneumoniae</i> | 1 | NO | N/A |
| ARLG-8128 | No  | N/A  | NO | Negative | <i>K. variicola</i>  | <i>K. variicola</i>  | 1 | NO | N/A |

|           |     |           |    |          |                      |                      |   |     |     |
|-----------|-----|-----------|----|----------|----------------------|----------------------|---|-----|-----|
| ARLG-7913 | No  | N/A       | NO | Negative | <i>K. pneumoniae</i> | <i>K. pneumoniae</i> | 1 | NO  | N/A |
| ARLG-7815 | No  | N/A       | NO | Negative | <i>K. pneumoniae</i> | <i>K. pneumoniae</i> | 1 | NO  | N/A |
| ARLG-7703 | No  | N/A       | NO | Negative | <i>K. pneumoniae</i> | <i>K. pneumoniae</i> | 1 | NO  | N/A |
| ARLG-7546 | No  | N/A       | NO | Negative | <i>K. pneumoniae</i> | <i>K. pneumoniae</i> | 1 | NO  | N/A |
| ARLG-7667 | No  | N/A       | NO | Negative | <i>K. pneumoniae</i> | <i>K. pneumoniae</i> | 1 | NO  | N/A |
| ARLG-7724 | Yes | KPC2      | NO | Negative | <i>K. pneumoniae</i> | <i>K. pneumoniae</i> | 1 | NO  | N/A |
| ARLG-7823 | No  | N/A       | NO | Negative | <i>K. variicola</i>  | <i>K. variicola</i>  | 1 | NO  | N/A |
| ARLG-8134 | Yes | KPC2      | NO | Negative | <i>K. pneumoniae</i> | <i>K. pneumoniae</i> | 1 | NO  | N/A |
| ARLG-8082 | No  | N/A       | NO | Negative | <i>K. pneumoniae</i> | <i>K. pneumoniae</i> | 1 | NO  | N/A |
| ARLG-7507 | Yes | KPC3      | NO | Negative | <i>K. pneumoniae</i> | <i>K. pneumoniae</i> | 1 | NO  | N/A |
| ARLG-8045 | No  | N/A       | NO | Negative | <i>K. pneumoniae</i> | <i>K. pneumoniae</i> | 1 | NO  | N/A |
| ARLG-8064 | No  | N/A       | NO | Negative | <i>K. pneumoniae</i> | <i>K. pneumoniae</i> | 1 | YES | 3   |
| ARLG-8068 | No  | N/A       | NO | Negative | <i>K. pneumoniae</i> | <i>K. pneumoniae</i> | 1 | NO  | N/A |
| ARLG-7668 | No  | N/A       | NO | Negative | <i>K. pneumoniae</i> | <i>K. pneumoniae</i> | 1 | NO  | N/A |
| ARLG-7671 | Yes | KPC2<br>8 | NO | Negative | <i>K. pneumoniae</i> | <i>K. pneumoniae</i> | 1 | NO  | N/A |
| ARLG-7807 | Yes | KPC3<br>4 | NO | Negative | <i>K. pneumoniae</i> | <i>K. pneumoniae</i> | 1 | NO  | N/A |
| ARLG-7810 | No  | N/A       | NO | Negative | <i>K. pneumoniae</i> | <i>K. pneumoniae</i> | 1 | NO  | N/A |
| ARLG-7818 | No  | N/A       | NO | Negative | <i>K. pneumoniae</i> | <i>K. pneumoniae</i> | 1 | NO  | N/A |
| ARLG-7825 | No  | N/A       | NO | Negative | <i>K. pneumoniae</i> | <i>K. pneumoniae</i> | 1 | NO  | N/A |
| ARLG-7888 | No  | N/A       | NO | Negative | <i>K. pneumoniae</i> | <i>K. pneumoniae</i> | 1 | NO  | N/A |
| ARLG-8022 | No  | N/A       | NO | Negative | <i>K. pneumoniae</i> | <i>K. pneumoniae</i> | 1 | NO  | N/A |
| ARLG-8039 | No  | N/A       | NO | Negative | <i>K. pneumoniae</i> | <i>K. pneumoniae</i> | 1 | NO  | N/A |
| ARLG-7905 | No  | N/A       | NO | Negative | <i>K. pneumoniae</i> | <i>K. pneumoniae</i> | 1 | NO  | N/A |
| ARLG-7578 | No  | N/A       | NO | Negative | <i>K. pneumoniae</i> | <i>K. pneumoniae</i> | 1 | NO  | N/A |
| ARLG-7615 | No  | N/A       | NO | Negative | <i>K. pneumoniae</i> | <i>K. pneumoniae</i> | 1 | NO  | N/A |
| ARLG-7640 | No  | N/A       | NO | Negative | <i>K. pneumoniae</i> | <i>K. pneumoniae</i> | 1 | NO  | N/A |
| ARLG-7645 | No  | N/A       | NO | Negative | <i>K. pneumoniae</i> | <i>K. pneumoniae</i> | 1 | NO  | N/A |
| ARLG-7929 | No  | N/A       | NO | Negative | <i>K. pneumoniae</i> | <i>K. pneumoniae</i> | 1 | NO  | N/A |

|             |     |      |     |          |                      |                      |   |     |     |
|-------------|-----|------|-----|----------|----------------------|----------------------|---|-----|-----|
| ARLG-7938   | No  | N/A  | NO  | Negative | <i>K. pneumoniae</i> | <i>K. pneumoniae</i> | 1 | NO  | N/A |
| ARLG-7835   | No  | N/A  | NO  | Negative | <i>K. pneumoniae</i> | <i>K. pneumoniae</i> | 1 | NO  | N/A |
| ARLG-6445   | No  | N/A  | NO  | Negative | <i>K. pneumoniae</i> | <i>K. pneumoniae</i> | 4 | NO  | N/A |
| ARLG-6450   | No  | N/A  | NO  | Negative | <i>K. pneumoniae</i> | <i>K. pneumoniae</i> | 4 | NO  | N/A |
| ARLG-6452   | No  | N/A  | NO  | Negative | <i>K. pneumoniae</i> | <i>K. pneumoniae</i> | 4 | NO  | N/A |
| ARLG-6511   | No  | N/A  | NO  | Negative | <i>K. pneumoniae</i> | <i>K. pneumoniae</i> | 4 | NO  | N/A |
| ARLG-6514   | No  | N/A  | NO  | Negative | <i>K. pneumoniae</i> | <i>K. pneumoniae</i> | 4 | NO  | N/A |
| ARLG-6518   | No  | N/A  | NO  | Negative | <i>K. pneumoniae</i> | <i>K. pneumoniae</i> | 4 | NO  | N/A |
| ARLG-6520   | No  | N/A  | NO  | Negative | <i>K. pneumoniae</i> | <i>K. pneumoniae</i> | 4 | NO  | N/A |
| ARLG-6473   | No  | N/A  | NO  | Negative | <i>K. pneumoniae</i> | <i>K. pneumoniae</i> | 4 | NO  | N/A |
| ARLG-6480   | No  | N/A  | NO  | Negative | <i>K. pneumoniae</i> | <i>K. pneumoniae</i> | 4 | NO  | N/A |
| ARLG-6490   | No  | N/A  | NO  | Negative | <i>K. pneumoniae</i> | <i>K. pneumoniae</i> | 4 | NO  | N/A |
| ARLG-6493   | No  | N/A  | NO  | Negative | <i>K. pneumoniae</i> | <i>K. pneumoniae</i> | 4 | NO  | N/A |
| ARLG-6537   | No  | N/A  | NO  | Negative | <i>K. pneumoniae</i> | <i>K. pneumoniae</i> | 4 | NO  | N/A |
| ARLG-6547   | No  | N/A  | NO  | Negative | <i>K. pneumoniae</i> | <i>K. pneumoniae</i> | 4 | NO  | N/A |
| ARLG-8087-P | Yes | KPC2 | NO  | Negative | <i>K. pneumoniae</i> | <i>K. pneumoniae</i> | 1 | NO  | N/A |
| ARLG-8091-P | Yes | KPC3 | NO  | Negative | <i>K. pneumoniae</i> | <i>K. pneumoniae</i> | 1 | NO  | N/A |
| ARLG-8099-P | Yes | KPC3 | YES | Negative | <i>K. pneumoniae</i> | <i>K. pneumoniae</i> | 1 | NO  | N/A |
| ARLG-8101-P | Yes | KPC3 | NO  | Negative | <i>K. pneumoniae</i> | <i>K. pneumoniae</i> | 1 | NO  | N/A |
| ARLG-8095-P | No  | N/A  | NO  | Negative | <i>K. pneumoniae</i> | <i>K. pneumoniae</i> | 1 | YES | 1   |
| ARLG-8107-P | Yes | KPC3 | YES | Positive | <i>K. pneumoniae</i> | <i>K. pneumoniae</i> | 1 | NO  | N/A |
| ARLG-7711-P | Yes | KPC3 | NO  | Negative | <i>K. pneumoniae</i> | <i>K. pneumoniae</i> | 1 | NO  | N/A |
| ARLG-7713-P | Yes | KPC3 | NO  | Negative | <i>K. pneumoniae</i> | <i>K. pneumoniae</i> | 1 | NO  | N/A |
| ARLG-7712-P | Yes | KPC3 | NO  | Negative | <i>K. pneumoniae</i> | <i>K. pneumoniae</i> | 1 | NO  | N/A |

|             |     |      |     |          |                      |                      |   |    |     |
|-------------|-----|------|-----|----------|----------------------|----------------------|---|----|-----|
| ARLG-7509-P | Yes | KPC3 | NO  | Negative | <i>K. pneumoniae</i> | <i>K. pneumoniae</i> | 1 | NO | N/A |
| ARLG-7510-P | Yes | KPC2 | NO  | Negative | <i>K. pneumoniae</i> | <i>K. pneumoniae</i> | 1 | NO | N/A |
| ARLG-7513-P | Yes | KPC3 | YES | Positive | <i>K. pneumoniae</i> | <i>K. pneumoniae</i> | 1 | NO | N/A |
| ARLG-7517-P | Yes | KPC2 | NO  | Negative | <i>K. pneumoniae</i> | <i>K. pneumoniae</i> | 1 | NO | N/A |
| ARLG-7520-P | Yes | KPC2 | YES | Positive | <i>K. pneumoniae</i> | <i>K. pneumoniae</i> | 1 | NO | N/A |
| ARLG-7521-P | Yes | KPC3 | NO  | Negative | <i>K. pneumoniae</i> | <i>K. pneumoniae</i> | 1 | NO | N/A |
| ARLG-7522-P | Yes | KPC2 | NO  | Negative | <i>K. pneumoniae</i> | <i>K. pneumoniae</i> | 1 | NO | N/A |
| ARLG-7525-P | Yes | KPC2 | YES | Positive | <i>K. pneumoniae</i> | <i>K. pneumoniae</i> | 1 | NO | N/A |
| ARLG-7527-P | Yes | KPC2 | NO  | Negative | <i>K. pneumoniae</i> | <i>K. pneumoniae</i> | 1 | NO | N/A |
| ARLG-7528-P | Yes | KPC2 | NO  | Negative | <i>K. pneumoniae</i> | <i>K. pneumoniae</i> | 1 | NO | N/A |
| ARLG-7532-P | Yes | KPC3 | NO  | Negative | <i>K. pneumoniae</i> | <i>K. pneumoniae</i> | 1 | NO | N/A |
| ARLG-7829-P | Yes | KPC2 | YES | Positive | <i>K. pneumoniae</i> | <i>K. pneumoniae</i> | 1 | NO | N/A |
| ARLG-7832-P | Yes | KPC3 | NO  | Negative | <i>K. pneumoniae</i> | <i>K. pneumoniae</i> | 1 | NO | N/A |
| ARLG-7839-P | Yes | KPC2 | YES | Positive | <i>K. pneumoniae</i> | <i>K. pneumoniae</i> | 1 | NO | N/A |
| ARLG-8109-P | Yes | KPC3 | NO  | Negative | <i>K. pneumoniae</i> | <i>K. pneumoniae</i> | 1 | NO | N/A |
| ARLG-8111-P | Yes | KPC3 | YES | Negative | <i>K. pneumoniae</i> | <i>K. pneumoniae</i> | 1 | NO | N/A |
| ARLG-8117-P | No  | N/A  | NO  | Negative | <i>K. pneumoniae</i> | <i>K. pneumoniae</i> | 1 | NO | N/A |
| ARLG-8127-P | Yes | KPC3 | NO  | Negative | <i>K. pneumoniae</i> | <i>K. pneumoniae</i> | 1 | NO | N/A |

|             |     |      |     |          |                      |                      |   |    |     |
|-------------|-----|------|-----|----------|----------------------|----------------------|---|----|-----|
| ARLG-7714-P | Yes | KPC3 | NO  | Negative | <i>K. pneumoniae</i> | <i>K. pneumoniae</i> | 1 | NO | N/A |
| ARLG-7716-P | Yes | KPC3 | NO  | Negative | <i>K. pneumoniae</i> | <i>K. pneumoniae</i> | 1 | NO | N/A |
| ARLG-7717-P | Yes | KPC3 | NO  | Negative | <i>K. pneumoniae</i> | <i>K. pneumoniae</i> | 1 | NO | N/A |
| ARLG-7718-P | Yes | KPC3 | NO  | Negative | <i>K. pneumoniae</i> | <i>K. pneumoniae</i> | 1 | NO | N/A |
| ARLG-7535-P | Yes | KPC2 | NO  | Negative | <i>K. pneumoniae</i> | <i>K. pneumoniae</i> | 1 | NO | N/A |
| ARLG-7536-P | Yes | KPC2 | YES | Positive | <i>K. pneumoniae</i> | <i>K. pneumoniae</i> | 1 | NO | N/A |
| ARLG-7537-P | Yes | KPC3 | YES | Positive | <i>K. pneumoniae</i> | <i>K. pneumoniae</i> | 1 | NO | N/A |
| ARLG-7542-P | Yes | KPC3 | NO  | Negative | <i>K. variicola</i>  | <i>K. variicola</i>  | 1 | NO | N/A |
| ARLG-7544-P | Yes | KPC2 | YES | Positive | <i>K. pneumoniae</i> | <i>K. pneumoniae</i> | 1 | NO | N/A |
| ARLG-7547-P | Yes | KPC3 | YES | Positive | <i>K. pneumoniae</i> | <i>K. pneumoniae</i> | 1 | NO | N/A |
| ARLG-7548-P | Yes | KPC2 | NO  | Negative | <i>K. pneumoniae</i> | <i>K. pneumoniae</i> | 1 | NO | N/A |
| ARLG-7550-P | Yes | KPC2 | YES | Positive | <i>K. pneumoniae</i> | <i>K. pneumoniae</i> | 1 | NO | N/A |
| ARLG-7551-P | Yes | KPC2 | YES | Negative | <i>K. pneumoniae</i> | <i>K. pneumoniae</i> | 1 | NO | N/A |
| ARLG-7552-P | Yes | KPC2 | NO  | Negative | <i>K. pneumoniae</i> | <i>K. pneumoniae</i> | 1 | NO | N/A |
| ARLG-7553-P | Yes | KPC3 | YES | Positive | <i>K. pneumoniae</i> | <i>K. pneumoniae</i> | 1 | NO | N/A |
| ARLG-7529-P | Yes | KPC2 | YES | Positive | <i>K. pneumoniae</i> | <i>K. pneumoniae</i> | 1 | NO | N/A |
| ARLG-7847-P | Yes | KPC3 | NO  | Negative | <i>K. pneumoniae</i> | <i>K. pneumoniae</i> | 1 | NO | N/A |
| ARLG-7849-P | Yes | KPC3 | NO  | Negative | <i>K. pneumoniae</i> | <i>K. pneumoniae</i> | 1 | NO | N/A |

|             |     |      |     |          |                      |                      |   |     |     |
|-------------|-----|------|-----|----------|----------------------|----------------------|---|-----|-----|
| ARLG-7799-P | Yes | KPC3 | YES | Negative | <i>K. pneumoniae</i> | <i>K. pneumoniae</i> | 1 | YES | 3   |
| ARLG-7801-P | Yes | KPC2 | NO  | Negative | <i>K. pneumoniae</i> | <i>K. pneumoniae</i> | 1 | NO  | N/A |
| ARLG-8135-P | Yes | KPC3 | NO  | Negative | <i>K. pneumoniae</i> | <i>K. pneumoniae</i> | 1 | NO  | N/A |
| ARLG-7541-P | Yes | KPC2 | NO  | Negative | <i>K. pneumoniae</i> | <i>K. pneumoniae</i> | 1 | NO  | N/A |
| ARLG-7837-P | Yes | KPC2 | YES | Positive | <i>K. pneumoniae</i> | <i>K. pneumoniae</i> | 1 | NO  | N/A |
| ARLG-7851-P | Yes | KPC3 | NO  | Negative | <i>K. pneumoniae</i> | <i>K. pneumoniae</i> | 1 | YES | 1   |
| ARLG-7675-P | Yes | KPC3 | NO  | Negative | <i>K. pneumoniae</i> | <i>K. pneumoniae</i> | 1 | NO  | N/A |
| ARLG-7576-P | Yes | KPC2 | YES | Positive | <i>K. pneumoniae</i> | <i>K. pneumoniae</i> | 1 | NO  | N/A |
| ARLG-7556-P | Yes | KPC2 | YES | Positive | <i>K. pneumoniae</i> | <i>K. pneumoniae</i> | 1 | YES | 2   |
| ARLG-7582-P | Yes | KPC2 | YES | Positive | <i>K. pneumoniae</i> | <i>K. pneumoniae</i> | 1 | NO  | N/A |
| ARLG-7957-P | Yes | KPC3 | NO  | Negative | <i>K. pneumoniae</i> | <i>K. pneumoniae</i> | 1 | NO  | N/A |
| ARLG-7584-P | No  | N/A  | NO  | Negative | <i>K. pneumoniae</i> | <i>K. pneumoniae</i> | 1 | NO  | N/A |
| ARLG-7988-P | Yes | KPC3 | NO  | Negative | <i>K. pneumoniae</i> | <i>K. pneumoniae</i> | 1 | NO  | N/A |
| ARLG-7591-P | Yes | KPC2 | NO  | Negative | <i>K. pneumoniae</i> | <i>K. pneumoniae</i> | 1 | NO  | N/A |
| ARLG-7924-P | Yes | KPC3 | NO  | Negative | <i>K. pneumoniae</i> | <i>K. pneumoniae</i> | 1 | NO  | N/A |
| ARLG-7557-P | Yes | KPC3 | NO  | Negative | <i>K. pneumoniae</i> | <i>K. pneumoniae</i> | 1 | NO  | N/A |
| ARLG-7596-P | Yes | KPC2 | YES | Positive | <i>K. pneumoniae</i> | <i>K. pneumoniae</i> | 1 | YES | 2   |
| ARLG-7560-P | Yes | KPC2 | YES | Positive | <i>K. pneumoniae</i> | <i>K. pneumoniae</i> | 1 | NO  | N/A |

|             |     |      |     |          |                      |                      |   |    |     |
|-------------|-----|------|-----|----------|----------------------|----------------------|---|----|-----|
| ARLG-7889-P | Yes | KPC3 | NO  | Negative | <i>K. pneumoniae</i> | <i>K. pneumoniae</i> | 1 | NO | N/A |
| ARLG-8025-P | Yes | KPC3 | NO  | Negative | <i>K. pneumoniae</i> | <i>K. pneumoniae</i> | 1 | NO | N/A |
| ARLG-7565-P | Yes | KPC2 | YES | Positive | <i>K. pneumoniae</i> | <i>K. pneumoniae</i> | 1 | NO | N/A |
| ARLG-8000-P | Yes | KPC2 | YES | Positive | <i>K. pneumoniae</i> | <i>K. pneumoniae</i> | 1 | NO | N/A |
| ARLG-7802-P | Yes | KPC3 | NO  | Negative | <i>K. pneumoniae</i> | <i>K. pneumoniae</i> | 1 | NO | N/A |
| ARLG-7616-P | Yes | KPC3 | NO  | Negative | <i>K. pneumoniae</i> | <i>K. pneumoniae</i> | 1 | NO | N/A |
| ARLG-8003-P | Yes | KPC2 | YES | Positive | <i>K. pneumoniae</i> | <i>K. pneumoniae</i> | 1 | NO | N/A |
| ARLG-8004-P | Yes | KPC3 | NO  | Negative | <i>K. pneumoniae</i> | <i>K. pneumoniae</i> | 1 | NO | N/A |
| ARLG-7617-P | Yes | KPC2 | YES | Positive | <i>K. pneumoniae</i> | <i>K. pneumoniae</i> | 1 | NO | N/A |
| ARLG-7963-P | No  | N/A  | NO  | Negative | <i>K. pneumoniae</i> | <i>K. pneumoniae</i> | 1 | NO | N/A |
| ARLG-7620-P | Yes | KPC2 | YES | Positive | <i>K. pneumoniae</i> | <i>K. pneumoniae</i> | 1 | NO | N/A |
| ARLG-7621-P | Yes | KPC3 | NO  | Negative | <i>K. pneumoniae</i> | <i>K. pneumoniae</i> | 1 | NO | N/A |
| ARLG-7901-P | Yes | KPC2 | NO  | Negative | <i>K. pneumoniae</i> | <i>K. pneumoniae</i> | 1 | NO | N/A |
| ARLG-7903-P | Yes | KPC3 | NO  | Negative | <i>K. pneumoniae</i> | <i>K. pneumoniae</i> | 1 | NO | N/A |
| ARLG-7622-P | Yes | KPC2 | YES | Positive | <i>K. pneumoniae</i> | <i>K. pneumoniae</i> | 1 | NO | N/A |
| ARLG-7965-P | No  | N/A  | NO  | Negative | <i>K. pneumoniae</i> | <i>K. pneumoniae</i> | 1 | NO | N/A |
| ARLG-7624-P | Yes | KPC2 | YES | Positive | <i>K. pneumoniae</i> | <i>K. pneumoniae</i> | 1 | NO | N/A |
| ARLG-7688-P | Yes | KPC2 | NO  | Negative | <i>K. pneumoniae</i> | <i>K. pneumoniae</i> | 1 | NO | N/A |



|             |     |           |     |          |                      |                      |   |     |     |
|-------------|-----|-----------|-----|----------|----------------------|----------------------|---|-----|-----|
| ARLG-7906-P | Yes | KPC2      | NO  | Negative | <i>K. pneumoniae</i> | <i>K. pneumoniae</i> | 1 | NO  | N/A |
| ARLG-8007-P | Yes | KPC3      | NO  | Negative | <i>K. pneumoniae</i> | <i>K. pneumoniae</i> | 1 | NO  | N/A |
| ARLG-8010-P | Yes | KPC3<br>1 | NO  | Negative | <i>K. pneumoniae</i> | <i>K. pneumoniae</i> | 1 | NO  | N/A |
| ARLG-7775-P | Yes | KPC3      | NO  | Negative | <i>K. pneumoniae</i> | <i>K. pneumoniae</i> | 1 | NO  | N/A |
| ARLG-7696-P | Yes | KPC2      | YES | Positive | <i>K. pneumoniae</i> | <i>K. pneumoniae</i> | 1 | YES | 1   |
| ARLG-7697-P | Yes | KPC3      | NO  | Negative | <i>K. pneumoniae</i> | <i>K. pneumoniae</i> | 1 | NO  | N/A |
| ARLG-7631-P | Yes | KPC2      | YES | Positive | <i>K. pneumoniae</i> | <i>K. pneumoniae</i> | 1 | NO  | N/A |
| ARLG-7791-P | Yes | KPC2      | YES | Positive | <i>K. pneumoniae</i> | <i>K. pneumoniae</i> | 1 | NO  | N/A |
| ARLG-7779-P | Yes | KPC2      | YES | Positive | <i>K. pneumoniae</i> | <i>K. pneumoniae</i> | 1 | YES | 1   |
| ARLG-7642-P | Yes | KPC2      | NO  | Negative | <i>K. pneumoniae</i> | <i>K. pneumoniae</i> | 1 | NO  | N/A |
| ARLG-7572-P | Yes | KPC3      | NO  | Negative | <i>K. pneumoniae</i> | <i>K. pneumoniae</i> | 1 | NO  | N/A |
| ARLG-7646-P | Yes | KPC2      | YES | Positive | <i>K. pneumoniae</i> | <i>K. pneumoniae</i> | 1 | NO  | N/A |
| ARLG-7647-P | Yes | KPC3      | NO  | Negative | <i>K. pneumoniae</i> | <i>K. pneumoniae</i> | 1 | NO  | N/A |
| ARLG-7654-P | Yes | KPC3      | NO  | Negative | <i>K. pneumoniae</i> | <i>K. pneumoniae</i> | 1 | NO  | N/A |
| ARLG-7981-P | No  | N/A       | NO  | Negative | <i>K. pneumoniae</i> | <i>K. pneumoniae</i> | 1 | NO  | N/A |
| ARLG-7982-P | Yes | KPC3      | NO  | Negative | <i>K. pneumoniae</i> | <i>K. pneumoniae</i> | 1 | NO  | N/A |
| ARLG-7656-P | Yes | KPC2      | YES | Positive | <i>K. pneumoniae</i> | <i>K. pneumoniae</i> | 1 | NO  | N/A |
| ARLG-8020-P | Yes | KPC2      | YES | Positive | <i>K. pneumoniae</i> | <i>K. pneumoniae</i> | 1 | NO  | N/A |

|             |     |      |     |          |                      |                      |   |     |     |
|-------------|-----|------|-----|----------|----------------------|----------------------|---|-----|-----|
| ARLG-8021-P | Yes | KPC3 | NO  | Negative | <i>K. pneumoniae</i> | <i>K. pneumoniae</i> | 1 | NO  | N/A |
| ARLG-7983-P | Yes | KPC3 | NO  | Negative | <i>K. pneumoniae</i> | <i>K. pneumoniae</i> | 1 | NO  | N/A |
| ARLG-7673-P | Yes | KPC3 | NO  | Negative | <i>K. pneumoniae</i> | <i>K. pneumoniae</i> | 1 | NO  | N/A |
| ARLG-7729-P | Yes | KPC2 | NO  | Negative | <i>K. pneumoniae</i> | <i>K. pneumoniae</i> | 1 | NO  | N/A |
| ARLG-7735-P | Yes | KPC3 | NO  | Negative | <i>K. pneumoniae</i> | <i>K. pneumoniae</i> | 1 | NO  | N/A |
| ARLG-7916-P | Yes | KPC3 | NO  | Negative | <i>K. pneumoniae</i> | <i>K. pneumoniae</i> | 1 | NO  | N/A |
| ARLG-7996-U | Yes | KPC2 | YES | Positive | <i>K. pneumoniae</i> | <i>K. pneumoniae</i> | 1 | NO  | N/A |
| ARLG-7618-U | Yes | KPC2 | YES | Positive | <i>K. pneumoniae</i> | <i>K. pneumoniae</i> | 1 | NO  | N/A |
| ARLG-3495   | Yes | KPC2 | YES | Positive | <i>K. pneumoniae</i> | <i>K. pneumoniae</i> | 1 | NO  | N/A |
| ARLG-3496   | Yes | KPC3 | NO  | Negative | <i>K. pneumoniae</i> | <i>K. pneumoniae</i> | 1 | YES | 4   |
| ARLG-3499   | Yes | KPC3 | NO  | Negative | <i>K. pneumoniae</i> | <i>K. pneumoniae</i> | 1 | NO  | N/A |
| ARLG-3503   | Yes | KPC3 | NO  | Negative | <i>K. pneumoniae</i> | <i>K. pneumoniae</i> | 1 | YES | 4   |
| ARLG-3504   | Yes | KPC2 | YES | Positive | <i>K. pneumoniae</i> | <i>K. pneumoniae</i> | 1 | NO  | N/A |
| ARLG-3506   | Yes | KPC2 | NO  | Negative | <i>K. pneumoniae</i> | <i>K. pneumoniae</i> | 1 | NO  | N/A |
| ARLG-3508   | Yes | KPC2 | NO  | Negative | <i>K. pneumoniae</i> | <i>K. pneumoniae</i> | 1 | NO  | N/A |
| ARLG-3510   | No  | N/A  | NO  | Negative | <i>K. pneumoniae</i> | <i>K. pneumoniae</i> | 1 | YES | 4   |
| ARLG-3511   | Yes | KPC3 | YES | Positive | <i>K. pneumoniae</i> | <i>K. pneumoniae</i> | 1 | YES | 3   |
| ARLG-3517   | Yes | KPC2 | YES | Positive | <i>K. pneumoniae</i> | <i>K. pneumoniae</i> | 1 | NO  | N/A |
| ARLG-3518   | Yes | KPC2 | YES | Positive | <i>K. pneumoniae</i> | <i>K. pneumoniae</i> | 1 | NO  | N/A |
| ARLG-3520   | Yes | KPC2 | NO  | Negative | <i>K. pneumoniae</i> | <i>K. pneumoniae</i> | 1 | NO  | N/A |
| ARLG-3523   | Yes | KPC3 | NO  | Negative | <i>K. pneumoniae</i> | <i>K. pneumoniae</i> | 1 | NO  | N/A |
| ARLG-3524   | No  | N/A  | NO  | Negative | <i>K. pneumoniae</i> | <i>K. pneumoniae</i> | 1 | NO  | N/A |
| ARLG-3527   | Yes | KPC3 | NO  | Negative | <i>K. pneumoniae</i> | <i>K. pneumoniae</i> | 1 | NO  | N/A |
| ARLG-3529   | Yes | KPC2 | YES | Positive | <i>K. pneumoniae</i> | <i>K. pneumoniae</i> | 1 | NO  | N/A |
| ARLG-3530   | Yes | KPC3 | NO  | Negative | <i>K. pneumoniae</i> | <i>K. pneumoniae</i> | 1 | NO  | N/A |

|             |     |      |     |          |                      |                      |   |    |     |
|-------------|-----|------|-----|----------|----------------------|----------------------|---|----|-----|
| ARLG-3532   | Yes | KPC3 | NO  | Negative | <i>K. pneumoniae</i> | <i>K. pneumoniae</i> | 1 | NO | N/A |
| ARLG-3533   | No  | N/A  | NO  | Negative | <i>K. pneumoniae</i> | <i>K. pneumoniae</i> | 1 | NO | N/A |
| ARLG-3534   | Yes | KPC3 | NO  | Negative | <i>K. pneumoniae</i> | <i>K. pneumoniae</i> | 1 | NO | N/A |
| ARLG-3535   | Yes | KPC3 | NO  | Negative | <i>K. pneumoniae</i> | <i>K. pneumoniae</i> | 1 | NO | N/A |
| ARLG-3536   | No  | N/A  | NO  | Negative | <i>K. pneumoniae</i> | <i>K. pneumoniae</i> | 1 | NO | N/A |
| ARLG-3546   | Yes | KPC3 | NO  | Negative | <i>K. pneumoniae</i> | <i>K. pneumoniae</i> | 1 | NO | N/A |
| ARLG-3548   | Yes | KPC3 | NO  | Negative | <i>K. pneumoniae</i> | <i>K. pneumoniae</i> | 1 | NO | N/A |
| ARLG-3553-P | Yes | KPC2 | YES | Positive | <i>K. pneumoniae</i> | <i>K. pneumoniae</i> | 1 | NO | N/A |
| ARLG-3567-P | Yes | KPC2 | YES | Positive | <i>K. pneumoniae</i> | <i>K. pneumoniae</i> | 1 | NO | N/A |
| ARLG-3575-P | Yes | KPC2 | YES | Positive | <i>K. pneumoniae</i> | <i>K. pneumoniae</i> | 1 | NO | N/A |
| ARLG-3576-P | Yes | KPC2 | YES | Positive | <i>K. pneumoniae</i> | <i>K. pneumoniae</i> | 1 | NO | N/A |
| ARLG-3578-P | Yes | KPC3 | YES | Positive | <i>K. pneumoniae</i> | <i>K. pneumoniae</i> | 1 | NO | N/A |
| ARLG-3591-P | Yes | KPC3 | NO  | Negative | <i>K. pneumoniae</i> | <i>K. pneumoniae</i> | 1 | NO | N/A |
| ARLG-3594-P | Yes | KPC2 | YES | Positive | <i>K. pneumoniae</i> | <i>K. pneumoniae</i> | 1 | NO | N/A |
| ARLG-3595-P | No  | N/A  | NO  | Negative | <i>K. pneumoniae</i> | <i>K. pneumoniae</i> | 1 | NO | N/A |
| ARLG-3596-P | Yes | KPC2 | YES | Positive | <i>K. pneumoniae</i> | <i>K. pneumoniae</i> | 1 | NO | N/A |
| ARLG-3598-P | Yes | KPC3 | NO  | Negative | <i>K. pneumoniae</i> | <i>K. pneumoniae</i> | 1 | NO | N/A |
| ARLG-3602-P | Yes | KPC2 | NO  | Negative | <i>K. pneumoniae</i> | <i>K. pneumoniae</i> | 1 | NO | N/A |
| ARLG-3603-P | Yes | KPC3 | NO  | Negative | <i>K. pneumoniae</i> | <i>K. pneumoniae</i> | 1 | NO | N/A |
| ARLG-3609-P | No  | N/A  | NO  | Negative | <i>K. pneumoniae</i> | <i>K. pneumoniae</i> | 1 | NO | N/A |
| ARLG-3611-P | Yes | KPC3 | NO  | Negative | <i>K. pneumoniae</i> | <i>K. pneumoniae</i> | 1 | NO | N/A |

|             |     |      |     |          |                      |                      |   |    |     |
|-------------|-----|------|-----|----------|----------------------|----------------------|---|----|-----|
| ARLG-3612-P | Yes | KPC2 | YES | Positive | <i>K. pneumoniae</i> | <i>K. pneumoniae</i> | 1 | NO | N/A |
| ARLG-3613-P | Yes | KPC3 | NO  | Negative | <i>K. pneumoniae</i> | <i>K. pneumoniae</i> | 1 | NO | N/A |
| ARLG-3614-P | Yes | KPC2 | YES | Positive | <i>K. pneumoniae</i> | <i>K. pneumoniae</i> | 1 | NO | N/A |
| ARLG-3616-P | Yes | KPC2 | NO  | Negative | <i>K. pneumoniae</i> | <i>K. pneumoniae</i> | 1 | NO | N/A |
| ARLG-3617-P | Yes | KPC2 | YES | Positive | <i>K. pneumoniae</i> | <i>K. pneumoniae</i> | 1 | NO | N/A |
| ARLG-3618-P | Yes | KPC3 | NO  | Negative | <i>K. pneumoniae</i> | <i>K. pneumoniae</i> | 1 | NO | N/A |
| ARLG-3621-P | Yes | KPC2 | YES | Positive | <i>K. pneumoniae</i> | <i>K. pneumoniae</i> | 1 | NO | N/A |
| ARLG-3622-P | Yes | KPC3 | YES | Positive | <i>K. pneumoniae</i> | <i>K. pneumoniae</i> | 1 | NO | N/A |
| ARLG-3623-P | Yes | KPC2 | NO  | Negative | <i>K. pneumoniae</i> | <i>K. pneumoniae</i> | 1 | NO | N/A |
| ARLG-3626-P | Yes | KPC2 | YES | Positive | <i>K. pneumoniae</i> | <i>K. pneumoniae</i> | 1 | NO | N/A |
| ARLG-3627-P | No  | N/A  | NO  | Negative | <i>K. pneumoniae</i> | <i>K. pneumoniae</i> | 1 | NO | N/A |
| ARLG-3628-P | Yes | KPC2 | YES | Positive | <i>K. pneumoniae</i> | <i>K. pneumoniae</i> | 1 | NO | N/A |
| ARLG-3629-P | Yes | KPC2 | NO  | Negative | <i>K. pneumoniae</i> | <i>K. pneumoniae</i> | 1 | NO | N/A |
| ARLG-3630-P | Yes | KPC2 | YES | Positive | <i>K. pneumoniae</i> | <i>K. pneumoniae</i> | 1 | NO | N/A |
| ARLG-3631-P | No  | N/A  | NO  | Negative | <i>K. pneumoniae</i> | <i>K. pneumoniae</i> | 1 | NO | N/A |
| ARLG-3633-P | Yes | KPC2 | NO  | Negative | <i>K. pneumoniae</i> | <i>K. pneumoniae</i> | 1 | NO | N/A |
| ARLG-3634-P | Yes | KPC3 | NO  | Negative | <i>K. pneumoniae</i> | <i>K. pneumoniae</i> | 1 | NO | N/A |
| ARLG-3635-P | Yes | KPC2 | NO  | Negative | <i>K. pneumoniae</i> | <i>K. pneumoniae</i> | 1 | NO | N/A |

|             |     |      |     |          |                      |                      |   |     |     |
|-------------|-----|------|-----|----------|----------------------|----------------------|---|-----|-----|
| ARLG-3637-P | Yes | KPC3 | NO  | Negative | <i>K. pneumoniae</i> | <i>K. pneumoniae</i> | 1 | NO  | N/A |
| ARLG-3638-P | Yes | KPC2 | NO  | Negative | <i>K. pneumoniae</i> | <i>K. pneumoniae</i> | 1 | NO  | N/A |
| ARLG-3639-P | No  | N/A  | NO  | Negative | <i>K. pneumoniae</i> | <i>K. pneumoniae</i> | 1 | NO  | N/A |
| ARLG-3640-P | No  | N/A  | NO  | Negative | <i>K. pneumoniae</i> | <i>K. pneumoniae</i> | 1 | YES | 3   |
| ARLG-3641-P | Yes | KPC2 | NO  | Negative | <i>K. pneumoniae</i> | <i>K. pneumoniae</i> | 1 | NO  | N/A |
| ARLG-3642-P | Yes | KPC2 | NO  | Negative | <i>K. pneumoniae</i> | <i>K. pneumoniae</i> | 1 | NO  | N/A |
| ARLG-3643-P | Yes | KPC2 | NO  | Negative | <i>K. pneumoniae</i> | <i>K. pneumoniae</i> | 1 | NO  | N/A |
| ARLG-3644-P | No  | N/A  | NO  | Negative | <i>K. pneumoniae</i> | <i>K. pneumoniae</i> | 1 | NO  | N/A |
| ARLG-3645-P | No  | N/A  | NO  | Negative | <i>K. pneumoniae</i> | <i>K. pneumoniae</i> | 1 | NO  | N/A |
| ARLG-3646-P | No  | N/A  | NO  | Negative | <i>K. pneumoniae</i> | <i>K. pneumoniae</i> | 1 | YES | 4   |
| ARLG-4550-P | Yes | KPC3 | NO  | Negative | <i>K. pneumoniae</i> | <i>K. pneumoniae</i> | 1 | NO  | N/A |
| ARLG-4541-P | Yes | KPC3 | NO  | Negative | <i>K. pneumoniae</i> | <i>K. pneumoniae</i> | 1 | NO  | N/A |
| ARLG-4542-P | Yes | KPC2 | NO  | Negative | <i>K. pneumoniae</i> | <i>K. pneumoniae</i> | 1 | NO  | N/A |
| ARLG-4552-P | Yes | KPC3 | YES | Positive | <i>K. pneumoniae</i> | <i>K. pneumoniae</i> | 1 | NO  | N/A |
| ARLG-4551-P | Yes | KPC2 | YES | Positive | <i>K. pneumoniae</i> | <i>K. pneumoniae</i> | 1 | NO  | N/A |
| ARLG-4543-P | No  | N/A  | NO  | Negative | <i>K. pneumoniae</i> | <i>K. pneumoniae</i> | 1 | NO  | N/A |
| ARLG-4289-P | Yes | KPC2 | YES | Positive | <i>K. pneumoniae</i> | <i>K. pneumoniae</i> | 1 | YES | 2   |
| ARLG-4546-P | Yes | KPC2 | NO  | Negative | <i>K. pneumoniae</i> | <i>K. pneumoniae</i> | 1 | NO  | N/A |

|             |     |      |     |          |                      |                      |   |     |     |
|-------------|-----|------|-----|----------|----------------------|----------------------|---|-----|-----|
| ARLG-4544-P | Yes | KPC3 | YES | Positive | <i>K. pneumoniae</i> | <i>K. pneumoniae</i> | 1 | YES | 2   |
| ARLG-4534-P | Yes | KPC2 | YES | Positive | <i>K. pneumoniae</i> | <i>K. pneumoniae</i> | 1 | NO  | N/A |
| ARLG-4537-P | Yes | KPC3 | NO  | Negative | <i>K. pneumoniae</i> | <i>K. pneumoniae</i> | 1 | NO  | N/A |
| ARLG-4304-P | No  | N/A  | NO  | Negative | <i>K. pneumoniae</i> | <i>K. pneumoniae</i> | 1 | NO  | N/A |
| ARLG-4228-P | Yes | KPC3 | NO  | Negative | <i>K. pneumoniae</i> | <i>K. pneumoniae</i> | 1 | NO  | N/A |
| ARLG-4229-P | Yes | KPC3 | NO  | Negative | <i>K. pneumoniae</i> | <i>K. pneumoniae</i> | 1 | NO  | N/A |
| ARLG-4232   | Yes | KPC3 | YES | Positive | <i>K. pneumoniae</i> | <i>K. pneumoniae</i> | 1 | YES | 2   |
| ARLG-4234   | Yes | KPC2 | YES | Positive | <i>K. pneumoniae</i> | <i>K. pneumoniae</i> | 1 | NO  | N/A |
| ARLG-4235-P | Yes | KPC2 | YES | Positive | <i>K. pneumoniae</i> | <i>K. pneumoniae</i> | 1 | NO  | N/A |
| ARLG-4236-P | Yes | KPC2 | YES | Positive | <i>K. pneumoniae</i> | <i>K. pneumoniae</i> | 1 | NO  | N/A |
| ARLG-4237   | No  | N/A  | NO  | Negative | <i>K. pneumoniae</i> | <i>K. pneumoniae</i> | 1 | NO  | N/A |
| ARLG-4241   | Yes | KPC2 | YES | Positive | <i>K. pneumoniae</i> | <i>K. pneumoniae</i> | 1 | NO  | N/A |
| ARLG-4242   | Yes | KPC2 | YES | Positive | <i>K. pneumoniae</i> | <i>K. pneumoniae</i> | 1 | YES | 2   |
| ARLG-4243   | Yes | KPC2 | NO  | Negative | <i>K. pneumoniae</i> | <i>K. pneumoniae</i> | 1 | NO  | N/A |
| ARLG-4244   | No  | N/A  | NO  | Negative | <i>K. pneumoniae</i> | <i>K. pneumoniae</i> | 1 | NO  | N/A |
| ARLG-4245   | Yes | KPC2 | YES | Positive | <i>K. pneumoniae</i> | <i>K. pneumoniae</i> | 1 | NO  | N/A |
| ARLG-4246   | Yes | KPC2 | YES | Positive | <i>K. pneumoniae</i> | <i>K. pneumoniae</i> | 1 | YES | 1   |
| ARLG-4249   | Yes | KPC3 | NO  | Negative | <i>K. pneumoniae</i> | <i>K. pneumoniae</i> | 1 | NO  | N/A |
| ARLG-4250   | Yes | KPC2 | YES | Positive | <i>K. pneumoniae</i> | <i>K. pneumoniae</i> | 1 | NO  | N/A |
| ARLG-4251   | No  | N/A  | NO  | Negative | <i>K. pneumoniae</i> | <i>K. pneumoniae</i> | 1 | NO  | N/A |
| ARLG-4252   | Yes | KPC3 | NO  | Negative | <i>K. pneumoniae</i> | <i>K. pneumoniae</i> | 1 | NO  | N/A |
| ARLG-4257   | Yes | KPC2 | YES | Positive | <i>K. pneumoniae</i> | <i>K. pneumoniae</i> | 1 | NO  | N/A |
| ARLG-4258   | Yes | KPC3 | YES | Positive | <i>K. pneumoniae</i> | <i>K. pneumoniae</i> | 1 | NO  | N/A |
| ARLG-4260   | Yes | KPC2 | NO  | Negative | <i>K. pneumoniae</i> | <i>K. pneumoniae</i> | 1 | NO  | N/A |
| ARLG-4261   | No  | N/A  | NO  | Negative | <i>K. pneumoniae</i> | <i>K. pneumoniae</i> | 1 | NO  | N/A |

|           |     |      |     |          |                      |                      |   |     |     |
|-----------|-----|------|-----|----------|----------------------|----------------------|---|-----|-----|
| ARLG-4262 | No  | N/A  | NO  | Negative | <i>K. pneumoniae</i> | <i>K. pneumoniae</i> | 1 | NO  | N/A |
| ARLG-4263 | No  | N/A  | NO  | Negative | <i>K. pneumoniae</i> | <i>K. pneumoniae</i> | 1 | NO  | N/A |
| ARLG-4266 | Yes | KPC2 | NO  | Negative | <i>K. pneumoniae</i> | <i>K. pneumoniae</i> | 1 | NO  | N/A |
| ARLG-4374 | Yes | KPC2 | YES | Positive | <i>K. pneumoniae</i> | <i>K. pneumoniae</i> | 1 | NO  | N/A |
| ARLG-4387 | Yes | KPC2 | YES | Positive | <i>K. pneumoniae</i> | <i>K. pneumoniae</i> | 1 | NO  | N/A |
| ARLG-4390 | Yes | KPC3 | NO  | Negative | <i>K. pneumoniae</i> | <i>K. pneumoniae</i> | 1 | NO  | N/A |
| ARLG-4391 | No  | N/A  | NO  | Negative | <i>K. pneumoniae</i> | <i>K. pneumoniae</i> | 1 | NO  | N/A |
| ARLG-4354 | Yes | KPC2 | YES | Positive | <i>K. pneumoniae</i> | <i>K. pneumoniae</i> | 1 | NO  | N/A |
| ARLG-4356 | No  | N/A  | NO  | Negative | <i>K. pneumoniae</i> | <i>K. pneumoniae</i> | 1 | NO  | N/A |
| ARLG-4469 | Yes | KPC2 | YES | Positive | <i>K. pneumoniae</i> | <i>K. pneumoniae</i> | 1 | NO  | N/A |
| ARLG-4474 | Yes | KPC3 | NO  | Negative | <i>K. pneumoniae</i> | <i>K. pneumoniae</i> | 1 | NO  | N/A |
| ARLG-4476 | Yes | KPC3 | NO  | Negative | <i>K. pneumoniae</i> | <i>K. pneumoniae</i> | 1 | NO  | N/A |
| ARLG-4433 | Yes | KPC2 | YES | Positive | <i>K. pneumoniae</i> | <i>K. pneumoniae</i> | 1 | NO  | N/A |
| ARLG-4434 | Yes | KPC2 | YES | Positive | <i>K. pneumoniae</i> | <i>K. pneumoniae</i> | 1 | NO  | N/A |
| ARLG-4435 | Yes | KPC3 | NO  | Negative | <i>K. pneumoniae</i> | <i>K. pneumoniae</i> | 1 | NO  | N/A |
| ARLG-4440 | Yes | KPC3 | YES | Positive | <i>K. pneumoniae</i> | <i>K. pneumoniae</i> | 1 | NO  | N/A |
| ARLG-4441 | Yes | KPC2 | YES | Positive | <i>K. pneumoniae</i> | <i>K. pneumoniae</i> | 1 | NO  | N/A |
| ARLG-4267 | Yes | KPC2 | YES | Positive | <i>K. pneumoniae</i> | <i>K. pneumoniae</i> | 1 | NO  | N/A |
| ARLG-4268 | Yes | KPC2 | YES | Positive | <i>K. pneumoniae</i> | <i>K. pneumoniae</i> | 1 | NO  | N/A |
| ARLG-4269 | Yes | KPC2 | YES | Positive | <i>K. pneumoniae</i> | <i>K. pneumoniae</i> | 1 | NO  | N/A |
| ARLG-4272 | No  | N/A  | NO  | Negative | <i>K. pneumoniae</i> | <i>K. pneumoniae</i> | 1 | NO  | N/A |
| ARLG-4273 | Yes | KPC2 | YES | Positive | <i>K. pneumoniae</i> | <i>K. pneumoniae</i> | 1 | NO  | N/A |
| ARLG-4274 | No  | N/A  | NO  | Negative | <i>K. pneumoniae</i> | <i>K. pneumoniae</i> | 1 | NO  | N/A |
| ARLG-4184 | Yes | KPC3 | NO  | Negative | <i>K. pneumoniae</i> | <i>K. pneumoniae</i> | 1 | NO  | N/A |
| ARLG-4185 | Yes | KPC3 | NO  | Negative | <i>K. pneumoniae</i> | <i>K. pneumoniae</i> | 1 | NO  | N/A |
| ARLG-4187 | Yes | KPC2 | YES | Positive | <i>K. pneumoniae</i> | <i>K. pneumoniae</i> | 1 | NO  | N/A |
| ARLG-4190 | Yes | KPC3 | YES | Positive | <i>K. pneumoniae</i> | <i>K. pneumoniae</i> | 1 | YES | 3   |
| ARLG-4193 | Yes | KPC2 | YES | Negative | <i>K. pneumoniae</i> | <i>K. pneumoniae</i> | 1 | NO  | N/A |
| ARLG-4195 | No  | N/A  | NO  | Negative | <i>K. pneumoniae</i> | <i>K. pneumoniae</i> | 1 | NO  | N/A |
| ARLG-4196 | No  | N/A  | NO  | Negative | <i>K. pneumoniae</i> | <i>K. pneumoniae</i> | 1 | NO  | N/A |

|           |     |      |     |          |                      |                      |   |     |     |
|-----------|-----|------|-----|----------|----------------------|----------------------|---|-----|-----|
| ARLG-4197 | No  | N/A  | NO  | Negative | <i>K. pneumoniae</i> | <i>K. pneumoniae</i> | 1 | NO  | N/A |
| ARLG-4198 | Yes | KPC2 | YES | Positive | <i>K. pneumoniae</i> | <i>K. pneumoniae</i> | 1 | NO  | N/A |
| ARLG-4199 | Yes | KPC2 | YES | Positive | <i>K. pneumoniae</i> | <i>K. pneumoniae</i> | 1 | NO  | N/A |
| ARLG-4557 | Yes | KPC3 | YES | Negative | <i>K. pneumoniae</i> | <i>K. pneumoniae</i> | 1 | NO  | N/A |
| ARLG-4558 | Yes | KPC3 | YES | Positive | <i>K. pneumoniae</i> | <i>K. pneumoniae</i> | 1 | YES | 2   |
| ARLG-4554 | Yes | KPC3 | NO  | Negative | <i>K. pneumoniae</i> | <i>K. pneumoniae</i> | 1 | YES | 3   |
| ARLG-4555 | Yes | KPC2 | NO  | Negative | <i>K. pneumoniae</i> | <i>K. pneumoniae</i> | 1 | NO  | N/A |
| ARLG-4556 | Yes | KPC3 | NO  | Negative | <i>K. pneumoniae</i> | <i>K. pneumoniae</i> | 1 | NO  | N/A |
| ARLG-4378 | Yes | KPC2 | YES | Positive | <i>K. pneumoniae</i> | <i>K. pneumoniae</i> | 1 | NO  | N/A |
| ARLG-4380 | Yes | KPC3 | NO  | Negative | <i>K. pneumoniae</i> | <i>K. pneumoniae</i> | 1 | NO  | N/A |
| ARLG-4382 | Yes | KPC2 | NO  | Negative | <i>K. pneumoniae</i> | <i>K. pneumoniae</i> | 1 | NO  | N/A |
| ARLG-4358 | Yes | KPC2 | YES | Positive | <i>K. pneumoniae</i> | <i>K. pneumoniae</i> | 1 | NO  | N/A |
| ARLG-4359 | No  | N/A  | NO  | Negative | <i>K. pneumoniae</i> | <i>K. pneumoniae</i> | 1 | NO  | N/A |
| ARLG-4360 | Yes | KPC2 | NO  | Negative | <i>K. pneumoniae</i> | <i>K. pneumoniae</i> | 1 | NO  | N/A |
| ARLG-4364 | Yes | KPC3 | NO  | Negative | <i>K. pneumoniae</i> | <i>K. pneumoniae</i> | 1 | NO  | N/A |
| ARLG-4365 | Yes | KPC2 | NO  | Negative | <i>K. pneumoniae</i> | <i>K. pneumoniae</i> | 1 | NO  | N/A |
| ARLG-4506 | No  | N/A  | NO  | Negative | <i>K. pneumoniae</i> | <i>K. pneumoniae</i> | 1 | NO  | N/A |
| ARLG-4507 | Yes | KPC2 | NO  | Negative | <i>K. pneumoniae</i> | <i>K. pneumoniae</i> | 1 | NO  | N/A |
| ARLG-4508 | Yes | KPC3 | NO  | Negative | <i>K. pneumoniae</i> | <i>K. pneumoniae</i> | 1 | NO  | N/A |
| ARLG-4509 | Yes | KPC3 | NO  | Negative | <i>K. pneumoniae</i> | <i>K. pneumoniae</i> | 1 | NO  | N/A |
| ARLG-4510 | Yes | KPC3 | NO  | Negative | <i>K. pneumoniae</i> | <i>K. pneumoniae</i> | 1 | NO  | N/A |
| ARLG-4511 | Yes | KPC3 | NO  | Negative | <i>K. pneumoniae</i> | <i>K. pneumoniae</i> | 1 | NO  | N/A |
| ARLG-4492 | Yes | KPC3 | NO  | Negative | <i>K. pneumoniae</i> | <i>K. pneumoniae</i> | 1 | NO  | N/A |
| ARLG-4493 | Yes | KPC3 | NO  | Negative | <i>K. pneumoniae</i> | <i>K. pneumoniae</i> | 1 | NO  | N/A |
| ARLG-4495 | Yes | KPC3 | NO  | Negative | <i>K. pneumoniae</i> | <i>K. pneumoniae</i> | 1 | NO  | N/A |
| ARLG-4496 | Yes | KPC2 | YES | Positive | <i>K. pneumoniae</i> | <i>K. pneumoniae</i> | 1 | NO  | N/A |
| ARLG-4497 | Yes | KPC3 | YES | Positive | <i>K. pneumoniae</i> | <i>K. pneumoniae</i> | 1 | YES | 2   |
| ARLG-4498 | Yes | KPC3 | YES | Positive | <i>K. pneumoniae</i> | <i>K. pneumoniae</i> | 1 | NO  | N/A |
| ARLG-4499 | No  | N/A  | NO  | Negative | <i>K. pneumoniae</i> | <i>K. pneumoniae</i> | 1 | NO  | N/A |
| ARLG-4501 | Yes | KPC3 | NO  | Negative | <i>K. pneumoniae</i> | <i>K. pneumoniae</i> | 1 | NO  | N/A |



|           |     |      |     |          |                      |                      |   |     |     |
|-----------|-----|------|-----|----------|----------------------|----------------------|---|-----|-----|
| ARLG-4502 | Yes | KPC2 | YES | Positive | <i>K. pneumoniae</i> | <i>K. pneumoniae</i> | 1 | NO  | N/A |
| ARLG-4503 | Yes | KPC3 | NO  | Negative | <i>K. pneumoniae</i> | <i>K. pneumoniae</i> | 1 | NO  | N/A |
| ARLG-4445 | No  | N/A  | NO  | Negative | <i>K. pneumoniae</i> | <i>K. pneumoniae</i> | 1 | NO  | N/A |
| ARLG-4446 | Yes | KPC2 | YES | Positive | <i>K. pneumoniae</i> | <i>K. pneumoniae</i> | 1 | NO  | N/A |
| ARLG-4449 | Yes | KPC2 | YES | Positive | <i>K. pneumoniae</i> | <i>K. pneumoniae</i> | 1 | NO  | N/A |
| ARLG-4450 | No  | N/A  | NO  | Negative | <i>K. pneumoniae</i> | <i>K. pneumoniae</i> | 1 | NO  | N/A |
| ARLG-4451 | Yes | KPC2 | YES | Positive | <i>K. pneumoniae</i> | <i>K. pneumoniae</i> | 1 | NO  | N/A |
| ARLG-4452 | Yes | KPC3 | NO  | Negative | <i>K. pneumoniae</i> | <i>K. pneumoniae</i> | 1 | NO  | N/A |
| ARLG-4454 | Yes | KPC2 | YES | Positive | <i>K. pneumoniae</i> | <i>K. pneumoniae</i> | 1 | NO  | N/A |
| ARLG-4456 | Yes | KPC2 | YES | Positive | <i>K. pneumoniae</i> | <i>K. pneumoniae</i> | 1 | NO  | N/A |
| ARLG-4457 | Yes | KPC3 | NO  | Negative | <i>K. pneumoniae</i> | <i>K. pneumoniae</i> | 1 | NO  | N/A |
| ARLG-4459 | Yes | KPC3 | NO  | Negative | <i>K. pneumoniae</i> | <i>K. pneumoniae</i> | 1 | NO  | N/A |
| ARLG-4461 | Yes | KPC2 | YES | Positive | <i>K. pneumoniae</i> | <i>K. pneumoniae</i> | 1 | NO  | N/A |
| ARLG-4513 | No  | N/A  | NO  | Negative | <i>K. pneumoniae</i> | <i>K. pneumoniae</i> | 1 | NO  | N/A |
| ARLG-4514 | Yes | KPC3 | YES | Positive | <i>K. pneumoniae</i> | <i>K. pneumoniae</i> | 1 | YES | 2   |
| ARLG-4517 | Yes | KPC3 | NO  | Negative | <i>K. pneumoniae</i> | <i>K. pneumoniae</i> | 1 | NO  | N/A |
| ARLG-4521 | Yes | KPC3 | NO  | Negative | <i>K. pneumoniae</i> | <i>K. pneumoniae</i> | 1 | NO  | N/A |
| ARLG-4524 | Yes | KPC3 | NO  | Negative | <i>K. pneumoniae</i> | <i>K. pneumoniae</i> | 1 | NO  | N/A |
| ARLG-4532 | Yes | KPC3 | NO  | Negative | <i>K. pneumoniae</i> | <i>K. pneumoniae</i> | 1 | NO  | N/A |
| ARLG-4529 | Yes | KPC2 | YES | Positive | <i>K. pneumoniae</i> | <i>K. pneumoniae</i> | 1 | NO  | N/A |
| ARLG-4527 | Yes | KPC2 | YES | Positive | <i>K. pneumoniae</i> | <i>K. pneumoniae</i> | 1 | NO  | N/A |
| ARLG-4530 | Yes | KPC3 | NO  | Negative | <i>K. pneumoniae</i> | <i>K. pneumoniae</i> | 1 | NO  | N/A |
| ARLG-4528 | Yes | KPC3 | NO  | Negative | <i>K. pneumoniae</i> | <i>K. pneumoniae</i> | 1 | NO  | N/A |
| ARLG-4206 | No  | N/A  | NO  | Negative | <i>K. pneumoniae</i> | <i>K. pneumoniae</i> | 1 | NO  | N/A |
| ARLG-4208 | Yes | KPC2 | YES | Positive | <i>K. pneumoniae</i> | <i>K. pneumoniae</i> | 1 | NO  | N/A |
| ARLG-4211 | No  | N/A  | NO  | Negative | <i>K. pneumoniae</i> | <i>K. pneumoniae</i> | 1 | NO  | N/A |
| ARLG-4212 | Yes | KPC3 | NO  | Negative | <i>K. pneumoniae</i> | <i>K. pneumoniae</i> | 1 | NO  | N/A |
| ARLG-4213 | Yes | KPC2 | YES | Positive | <i>K. pneumoniae</i> | <i>K. pneumoniae</i> | 1 | NO  | N/A |
| ARLG-4214 | No  | N/A  | NO  | Negative | <i>K. pneumoniae</i> | <i>K. pneumoniae</i> | 1 | NO  | N/A |
| ARLG-4215 | No  | N/A  | NO  | Negative | <i>K. pneumoniae</i> | <i>K. pneumoniae</i> | 1 | NO  | N/A |

|             |     |      |     |          |                      |                      |   |     |     |
|-------------|-----|------|-----|----------|----------------------|----------------------|---|-----|-----|
| ARLG-4219   | Yes | KPC3 | NO  | Negative | <i>K. pneumoniae</i> | <i>K. pneumoniae</i> | 1 | NO  | N/A |
| ARLG-4220   | Yes | KPC2 | NO  | Negative | <i>K. pneumoniae</i> | <i>K. pneumoniae</i> | 1 | NO  | N/A |
| ARLG-4222   | Yes | KPC3 | NO  | Negative | <i>K. pneumoniae</i> | <i>K. pneumoniae</i> | 1 | NO  | N/A |
| ARLG-4370   | No  | N/A  | NO  | Negative | <i>K. pneumoniae</i> | <i>K. pneumoniae</i> | 1 | NO  | N/A |
| ARLG-4371   | Yes | KPC3 | NO  | Negative | <i>K. pneumoniae</i> | <i>K. pneumoniae</i> | 1 | NO  | N/A |
| ARLG-3302-P | Yes | KPC2 | YES | Positive | <i>K. pneumoniae</i> | <i>K. pneumoniae</i> | 1 | NO  | N/A |
| ARLG-3309-P | Yes | KPC2 | YES | Positive | <i>K. pneumoniae</i> | <i>K. pneumoniae</i> | 1 | NO  | N/A |
| ARLG-3316-P | No  | N/A  | NO  | Negative | <i>K. pneumoniae</i> | <i>K. pneumoniae</i> | 1 | NO  | N/A |
| ARLG-3318-P | Yes | KPC2 | YES | Positive | <i>K. pneumoniae</i> | <i>K. pneumoniae</i> | 1 | NO  | N/A |
| ARLG-3327-P | No  | N/A  | NO  | Negative | <i>K. pneumoniae</i> | <i>K. pneumoniae</i> | 1 | NO  | N/A |
| ARLG-3336-P | Yes | KPC3 | NO  | Negative | <i>K. pneumoniae</i> | <i>K. pneumoniae</i> | 1 | NO  | N/A |
| ARLG-3341-P | Yes | KPC3 | NO  | Negative | <i>K. pneumoniae</i> | <i>K. pneumoniae</i> | 1 | YES | 4   |
| ARLG-3345-P | Yes | KPC3 | NO  | Negative | <i>K. pneumoniae</i> | <i>K. pneumoniae</i> | 1 | NO  | N/A |
| ARLG-3356-P | Yes | KPC3 | NO  | Negative | <i>K. pneumoniae</i> | <i>K. pneumoniae</i> | 1 | NO  | N/A |
| ARLG-3360-P | Yes | KPC3 | NO  | Negative | <i>K. pneumoniae</i> | <i>K. pneumoniae</i> | 1 | NO  | N/A |
| ARLG-3363-P | Yes | KPC3 | NO  | Negative | <i>K. pneumoniae</i> | <i>K. pneumoniae</i> | 1 | NO  | N/A |
| ARLG-3366-P | Yes | KPC3 | NO  | Negative | <i>K. pneumoniae</i> | <i>K. pneumoniae</i> | 1 | NO  | N/A |
| ARLG-3372-P | Yes | KPC3 | NO  | Negative | <i>K. pneumoniae</i> | <i>K. pneumoniae</i> | 1 | NO  | N/A |
| ARLG-3380-P | Yes | KPC2 | YES | Positive | <i>K. pneumoniae</i> | <i>K. pneumoniae</i> | 1 | NO  | N/A |
| ARLG-3414-P | Yes | KPC3 | NO  | Negative | <i>K. pneumoniae</i> | <i>K. pneumoniae</i> | 1 | NO  | N/A |

|             |     |      |     |          |                      |                      |   |     |     |
|-------------|-----|------|-----|----------|----------------------|----------------------|---|-----|-----|
| ARLG-3415-P | Yes | KPC3 | NO  | Negative | <i>K. pneumoniae</i> | <i>K. pneumoniae</i> | 1 | NO  | N/A |
| ARLG-3451-P | No  | N/A  | NO  | Negative | <i>K. pneumoniae</i> | <i>K. pneumoniae</i> | 1 | NO  | N/A |
| ARLG-3463-P | Yes | KPC2 | YES | Positive | <i>K. pneumoniae</i> | <i>K. pneumoniae</i> | 1 | NO  | N/A |
| ARLG-3467-P | No  | N/A  | NO  | Negative | <i>K. pneumoniae</i> | <i>K. pneumoniae</i> | 1 | NO  | N/A |
| ARLG-3473-P | No  | N/A  | NO  | Negative | <i>K. pneumoniae</i> | <i>K. pneumoniae</i> | 1 | NO  | N/A |
| ARLG-3484-P | No  | N/A  | NO  | Negative | <i>K. pneumoniae</i> | <i>K. pneumoniae</i> | 1 | YES | 3   |
| ARLG-3489-P | Yes | KPC3 | NO  | Negative | <i>K. pneumoniae</i> | <i>K. pneumoniae</i> | 1 | NO  | N/A |
| ARLG-4419-P | Yes | KPC2 | YES | Positive | <i>K. pneumoniae</i> | <i>K. pneumoniae</i> | 1 | NO  | N/A |
| ARLG-4420-P | Yes | KPC2 | NO  | Negative | <i>K. pneumoniae</i> | <i>K. pneumoniae</i> | 1 | NO  | N/A |
| ARLG-4421-P | Yes | KPC2 | YES | Positive | <i>K. pneumoniae</i> | <i>K. pneumoniae</i> | 1 | NO  | N/A |
| ARLG-4422-P | Yes | KPC3 | NO  | Negative | <i>K. pneumoniae</i> | <i>K. pneumoniae</i> | 1 | NO  | N/A |
| ARLG-4423-P | Yes | KPC2 | NO  | Negative | <i>K. pneumoniae</i> | <i>K. pneumoniae</i> | 1 | NO  | N/A |
| ARLG-4424-P | Yes | KPC2 | YES | Positive | <i>K. pneumoniae</i> | <i>K. pneumoniae</i> | 1 | NO  | N/A |
| ARLG-4425-P | Yes | KPC3 | NO  | Negative | <i>K. pneumoniae</i> | <i>K. pneumoniae</i> | 1 | NO  | N/A |
| ARLG-4314-P | Yes | KPC3 | NO  | Negative | <i>K. pneumoniae</i> | <i>K. pneumoniae</i> | 1 | NO  | N/A |
| ARLG-4300-P | Yes | KPC2 | YES | Positive | <i>K. pneumoniae</i> | <i>K. pneumoniae</i> | 1 | NO  | N/A |
| ARLG-4301-P | Yes | KPC3 | NO  | Negative | <i>K. pneumoniae</i> | <i>K. pneumoniae</i> | 1 | NO  | N/A |
| ARLG-4305-P | No  | N/A  | NO  | Negative | <i>K. pneumoniae</i> | <i>K. pneumoniae</i> | 1 | YES | 3   |

|             |     |      |     |          |                      |                      |   |     |     |
|-------------|-----|------|-----|----------|----------------------|----------------------|---|-----|-----|
| ARLG-4336-P | Yes | KPC3 | NO  | Negative | <i>K. pneumoniae</i> | <i>K. pneumoniae</i> | 1 | NO  | N/A |
| ARLG-4340-P | Yes | KPC8 | NO  | Negative | <i>K. pneumoniae</i> | <i>K. pneumoniae</i> | 1 | NO  | N/A |
| ARLG-4173-P | No  | N/A  | NO  | Negative | <i>K. pneumoniae</i> | <i>K. pneumoniae</i> | 1 | NO  | N/A |
| ARLG-4384-P | No  | N/A  | NO  | Negative | <i>K. pneumoniae</i> | <i>K. pneumoniae</i> | 1 | NO  | N/A |
| ARLG-4279-P | Yes | KPC3 | NO  | Negative | <i>K. pneumoniae</i> | <i>K. pneumoniae</i> | 1 | NO  | N/A |
| ARLG-4480-P | Yes | KPC3 | NO  | Negative | <i>K. pneumoniae</i> | <i>K. pneumoniae</i> | 1 | NO  | N/A |
| ARLG-4481-P | Yes | KPC3 | NO  | Negative | <i>K. pneumoniae</i> | <i>K. pneumoniae</i> | 1 | NO  | N/A |
| ARLG-4160-P | Yes | KPC2 | YES | Positive | <i>K. pneumoniae</i> | <i>K. pneumoniae</i> | 1 | NO  | N/A |
| ARLG-4161-P | Yes | KPC2 | YES | Positive | <i>K. pneumoniae</i> | <i>K. pneumoniae</i> | 1 | NO  | N/A |
| ARLG-4162-P | Yes | KPC2 | YES | Positive | <i>K. pneumoniae</i> | <i>K. pneumoniae</i> | 1 | YES | 2   |
| ARLG-4176-P | No  | N/A  | NO  | Negative | <i>K. pneumoniae</i> | <i>K. pneumoniae</i> | 1 | YES | 3   |
| ARLG-4322-P | Yes | KPC3 | NO  | Negative | <i>K. pneumoniae</i> | <i>K. pneumoniae</i> | 1 | NO  | N/A |
| ARLG-4323-P | Yes | KPC2 | YES | Positive | <i>K. pneumoniae</i> | <i>K. pneumoniae</i> | 1 | YES | 1   |
| ARLG-4328-P | Yes | KPC3 | NO  | Negative | <i>K. pneumoniae</i> | <i>K. pneumoniae</i> | 1 | NO  | N/A |
| ARLG-4308-P | Yes | KPC3 | NO  | Negative | <i>K. pneumoniae</i> | <i>K. pneumoniae</i> | 1 | NO  | N/A |
| ARLG-4292-P | Yes | KPC2 | YES | Positive | <i>K. pneumoniae</i> | <i>K. pneumoniae</i> | 1 | NO  | N/A |
| ARLG-4293-P | Yes | KPC2 | NO  | Negative | <i>K. pneumoniae</i> | <i>K. pneumoniae</i> | 1 | NO  | N/A |
| ARLG-4294-P | Yes | KPC3 | NO  | Negative | <i>K. pneumoniae</i> | <i>K. pneumoniae</i> | 1 | NO  | N/A |

|             |     |      |     |          |                      |                      |   |    |     |
|-------------|-----|------|-----|----------|----------------------|----------------------|---|----|-----|
| ARLG-4426-P | Yes | KPC2 | YES | Positive | <i>K. pneumoniae</i> | <i>K. pneumoniae</i> | 1 | NO | N/A |
| ARLG-4427-P | Yes | KPC3 | NO  | Negative | <i>K. pneumoniae</i> | <i>K. pneumoniae</i> | 1 | NO | N/A |
| ARLG-4428-P | Yes | KPC2 | YES | Positive | <i>K. pneumoniae</i> | <i>K. pneumoniae</i> | 1 | NO | N/A |
| ARLG-4429-P | Yes | KPC2 | YES | Positive | <i>K. pneumoniae</i> | <i>K. pneumoniae</i> | 1 | NO | N/A |
| ARLG-4411-P | Yes | KPC2 | YES | Positive | <i>K. pneumoniae</i> | <i>K. pneumoniae</i> | 1 | NO | N/A |
| ARLG-4332-P | Yes | KPC3 | NO  | Negative | <i>K. pneumoniae</i> | <i>K. pneumoniae</i> | 1 | NO | N/A |
| ARLG-4181-P | Yes | KPC3 | NO  | Negative | <i>K. pneumoniae</i> | <i>K. pneumoniae</i> | 1 | NO | N/A |
| ARLG-4342-P | Yes | KPC3 | NO  | Negative | <i>K. pneumoniae</i> | <i>K. pneumoniae</i> | 1 | NO | N/A |
| ARLG-4179-P | No  | N/A  | NO  | Negative | <i>K. pneumoniae</i> | <i>K. pneumoniae</i> | 1 | NO | N/A |
| ARLG-4484-P | Yes | KPC2 | NO  | Negative | <i>K. pneumoniae</i> | <i>K. pneumoniae</i> | 1 | NO | N/A |
| ARLG-4487-P | Yes | KPC3 | NO  | Negative | <i>K. pneumoniae</i> | <i>K. pneumoniae</i> | 1 | NO | N/A |
| ARLG-4488-P | Yes | KPC2 | NO  | Negative | <i>K. pneumoniae</i> | <i>K. pneumoniae</i> | 1 | NO | N/A |
| ARLG-4296-P | Yes | KPC3 | NO  | Negative | <i>K. pneumoniae</i> | <i>K. pneumoniae</i> | 1 | NO | N/A |
| ARLG-4297-P | Yes | KPC3 | NO  | Negative | <i>K. pneumoniae</i> | <i>K. pneumoniae</i> | 1 | NO | N/A |
| ARLG-4344-P | Yes | KPC2 | YES | Positive | <i>K. pneumoniae</i> | <i>K. pneumoniae</i> | 1 | NO | N/A |
| ARLG-4345-P | Yes | KPC3 | NO  | Negative | <i>K. pneumoniae</i> | <i>K. pneumoniae</i> | 1 | NO | N/A |
| ARLG-4283-P | Yes | KPC3 | NO  | Negative | <i>K. pneumoniae</i> | <i>K. pneumoniae</i> | 1 | NO | N/A |
| ARLG-4287-P | Yes | KPC2 | NO  | Negative | <i>K. pneumoniae</i> | <i>K. pneumoniae</i> | 1 | NO | N/A |

|             |     |      |     |          |                      |                      |   |    |     |
|-------------|-----|------|-----|----------|----------------------|----------------------|---|----|-----|
| ARLG-4275-P | Yes | KPC2 | YES | Positive | <i>K. pneumoniae</i> | <i>K. pneumoniae</i> | 1 | NO | N/A |
| ARLG-4330-P | No  | N/A  | NO  | Negative | <i>K. pneumoniae</i> | <i>K. pneumoniae</i> | 1 | NO | N/A |
| ARLG-4333-P | Yes | KPC3 | NO  | Negative | <i>K. pneumoniae</i> | <i>K. pneumoniae</i> | 1 | NO | N/A |
| ARLG-4396-P | No  | N/A  | NO  | Negative | <i>K. pneumoniae</i> | <i>K. pneumoniae</i> | 1 | NO | N/A |
| ARLG-4397-P | Yes | KPC3 | NO  | Negative | <i>K. pneumoniae</i> | <i>K. pneumoniae</i> | 1 | NO | N/A |
| ARLG-4430-P | Yes | KPC2 | YES | Positive | <i>K. pneumoniae</i> | <i>K. pneumoniae</i> | 1 | NO | N/A |
| ARLG-4431-P | Yes | KPC2 | YES | Positive | <i>K. pneumoniae</i> | <i>K. pneumoniae</i> | 1 | NO | N/A |
| ARLG-4412-P | Yes | KPC3 | NO  | Negative | <i>K. pneumoniae</i> | <i>K. pneumoniae</i> | 1 | NO | N/A |
| ARLG-4413-P | No  | N/A  | NO  | Negative | <i>K. pneumoniae</i> | <i>K. pneumoniae</i> | 1 | NO | N/A |
| ARLG-4416-P | Yes | KPC2 | YES | Positive | <i>K. pneumoniae</i> | <i>K. pneumoniae</i> | 1 | NO | N/A |
| ARLG-4334-P | Yes | KPC3 | NO  | Negative | <i>K. pneumoniae</i> | <i>K. pneumoniae</i> | 1 | NO | N/A |
| ARLG-4483-P | Yes | KPC2 | NO  | Negative | <i>K. pneumoniae</i> | <i>K. pneumoniae</i> | 1 | NO | N/A |
| ARLG-4489-P | Yes | KPC2 | NO  | Negative | <i>K. pneumoniae</i> | <i>K. pneumoniae</i> | 1 | NO | N/A |
| ARLG-4490-P | Yes | KPC2 | NO  | Negative | <i>K. pneumoniae</i> | <i>K. pneumoniae</i> | 1 | NO | N/A |
| ARLG-4491-P | Yes | KPC2 | NO  | Negative | <i>K. pneumoniae</i> | <i>K. pneumoniae</i> | 1 | NO | N/A |
| ARLG-4324-P | Yes | KPC3 | NO  | Negative | <i>K. pneumoniae</i> | <i>K. pneumoniae</i> | 1 | NO | N/A |
| ARLG-4325-P | No  | N/A  | NO  | Negative | <i>K. pneumoniae</i> | <i>K. pneumoniae</i> | 1 | NO | N/A |
| ARLG-4225-P | No  | N/A  | NO  | Negative | <i>K. pneumoniae</i> | <i>K. pneumoniae</i> | 1 | NO | N/A |

|             |     |      |     |          |                      |                      |   |    |     |
|-------------|-----|------|-----|----------|----------------------|----------------------|---|----|-----|
| ARLG-4317-P | Yes | KPC2 | NO  | Negative | <i>K. pneumoniae</i> | <i>K. pneumoniae</i> | 1 | NO | N/A |
| ARLG-4462-P | Yes | KPC2 | YES | Positive | <i>K. pneumoniae</i> | <i>K. pneumoniae</i> | 1 | NO | N/A |
| ARLG-4319-P | Yes | KPC2 | NO  | Negative | <i>K. pneumoniae</i> | <i>K. pneumoniae</i> | 1 | NO | N/A |
| ARLG-4320-P | No  | N/A  | NO  | Negative | <i>K. pneumoniae</i> | <i>K. pneumoniae</i> | 1 | NO | N/A |
| ARLG-4338-P | Yes | KPC2 | YES | Positive | <i>K. pneumoniae</i> | <i>K. pneumoniae</i> | 1 | NO | N/A |
| ARLG-4339-P | Yes | KPC3 | NO  | Negative | <i>K. pneumoniae</i> | <i>K. pneumoniae</i> | 1 | NO | N/A |
| ARLG-4278-P | Yes | KPC2 | YES | Positive | <i>K. pneumoniae</i> | <i>K. pneumoniae</i> | 1 | NO | N/A |
| ARLG-4399-P | Yes | KPC2 | NO  | Negative | <i>K. pneumoniae</i> | <i>K. pneumoniae</i> | 1 | NO | N/A |
| ARLG-4230-P | Yes | KPC2 | NO  | Negative | <i>K. pneumoniae</i> | <i>K. pneumoniae</i> | 1 | NO | N/A |
| ARLG-4400-P | Yes | KPC2 | NO  | Negative | <i>K. pneumoniae</i> | <i>K. pneumoniae</i> | 1 | NO | N/A |
| ARLG-4403-P | Yes | KPC2 | NO  | Negative | <i>K. pneumoniae</i> | <i>K. pneumoniae</i> | 1 | NO | N/A |
| ARLG-4404-P | Yes | KPC2 | NO  | Negative | <i>K. pneumoniae</i> | <i>K. pneumoniae</i> | 1 | NO | N/A |
| ARLG-4408-P | No  | N/A  | NO  | Negative | <i>K. pneumoniae</i> | <i>K. pneumoniae</i> | 1 | NO | N/A |
| ARLG-4392-P | No  | N/A  | NO  | Negative | <i>K. pneumoniae</i> | <i>K. pneumoniae</i> | 1 | NO | N/A |
| ARLG-4169-P | Yes | KPC3 | NO  | Negative | <i>K. pneumoniae</i> | <i>K. pneumoniae</i> | 1 | NO | N/A |
| ARLG-4398-P | Yes | KPC3 | NO  | Negative | <i>K. pneumoniae</i> | <i>K. pneumoniae</i> | 1 | NO | N/A |
| ARLG-4172-P | No  | N/A  | NO  | Negative | <i>K. pneumoniae</i> | <i>K. pneumoniae</i> | 1 | NO | N/A |
| ARLG-4155-P | Yes | KPC2 | YES | Positive | <i>K. pneumoniae</i> | <i>K. pneumoniae</i> | 1 | NO | N/A |

|             |     |      |     |          |                      |                      |   |    |     |
|-------------|-----|------|-----|----------|----------------------|----------------------|---|----|-----|
| ARLG-4156-P | Yes | KPC2 | YES | Positive | <i>K. pneumoniae</i> | <i>K. pneumoniae</i> | 1 | NO | N/A |
| ARLG-4157-P | Yes | KPC2 | NO  | Negative | <i>K. pneumoniae</i> | <i>K. pneumoniae</i> | 1 | NO | N/A |
| ARLG-3177   | Yes | KPC2 | YES | Positive | <i>K. pneumoniae</i> | <i>K. pneumoniae</i> | 1 | NO | N/A |
| ARLG-3179   | Yes | KPC2 | YES | Positive | <i>K. pneumoniae</i> | <i>K. pneumoniae</i> | 1 | NO | N/A |
| ARLG-3180   | Yes | KPC2 | YES | Positive | <i>K. pneumoniae</i> | <i>K. pneumoniae</i> | 1 | NO | N/A |
| ARLG-3181   | Yes | KPC2 | YES | Positive | <i>K. pneumoniae</i> | <i>K. pneumoniae</i> | 1 | NO | N/A |
| ARLG-3182   | Yes | KPC2 | NO  | Negative | <i>K. pneumoniae</i> | <i>K. pneumoniae</i> | 1 | NO | N/A |
| ARLG-3183   | Yes | KPC2 | YES | Positive | <i>K. pneumoniae</i> | <i>K. pneumoniae</i> | 1 | NO | N/A |
| ARLG-3185   | No  | N/A  | NO  | Negative | <i>K. pneumoniae</i> | <i>K. pneumoniae</i> | 1 | NO | N/A |
| ARLG-3186   | No  | N/A  | NO  | Negative | <i>K. pneumoniae</i> | <i>K. pneumoniae</i> | 1 | NO | N/A |
| ARLG-3187   | Yes | KPC2 | NO  | Negative | <i>K. pneumoniae</i> | <i>K. pneumoniae</i> | 1 | NO | N/A |
| ARLG-3188   | Yes | KPC2 | YES | Positive | <i>K. pneumoniae</i> | <i>K. pneumoniae</i> | 1 | NO | N/A |
| ARLG-3192   | No  | N/A  | NO  | Negative | <i>K. pneumoniae</i> | <i>K. pneumoniae</i> | 1 | NO | N/A |
| ARLG-3194   | Yes | KPC2 | NO  | Negative | <i>K. pneumoniae</i> | <i>K. pneumoniae</i> | 1 | NO | N/A |
| ARLG-3195   | Yes | KPC2 | YES | Positive | <i>K. pneumoniae</i> | <i>K. pneumoniae</i> | 1 | NO | N/A |
| ARLG-3196   | Yes | KPC2 | YES | Positive | <i>K. pneumoniae</i> | <i>K. pneumoniae</i> | 1 | NO | N/A |
| ARLG-3197   | Yes | KPC2 | YES | Positive | <i>K. pneumoniae</i> | <i>K. pneumoniae</i> | 1 | NO | N/A |
| ARLG-3198   | Yes | KPC2 | NO  | Negative | <i>K. pneumoniae</i> | <i>K. pneumoniae</i> | 1 | NO | N/A |
| ARLG-3199   | Yes | KPC2 | NO  | Negative | <i>K. pneumoniae</i> | <i>K. pneumoniae</i> | 1 | NO | N/A |
| ARLG-3204   | Yes | KPC2 | YES | Positive | <i>K. pneumoniae</i> | <i>K. pneumoniae</i> | 1 | NO | N/A |
| ARLG-3205   | Yes | KPC2 | YES | Positive | <i>K. pneumoniae</i> | <i>K. pneumoniae</i> | 1 | NO | N/A |
| ARLG-3206   | Yes | KPC2 | YES | Positive | <i>K. pneumoniae</i> | <i>K. pneumoniae</i> | 1 | NO | N/A |
| ARLG-3208   | Yes | KPC2 | YES | Positive | <i>K. pneumoniae</i> | <i>K. pneumoniae</i> | 1 | NO | N/A |
| ARLG-3211   | Yes | KPC2 | YES | Positive | <i>K. pneumoniae</i> | <i>K. pneumoniae</i> | 1 | NO | N/A |
| ARLG-3213   | Yes | KPC2 | YES | Positive | <i>K. pneumoniae</i> | <i>K. pneumoniae</i> | 1 | NO | N/A |
| ARLG-3214   | Yes | KPC2 | YES | Positive | <i>K. pneumoniae</i> | <i>K. pneumoniae</i> | 1 | NO | N/A |
| ARLG-3215   | Yes | KPC2 | YES | Positive | <i>K. pneumoniae</i> | <i>K. pneumoniae</i> | 1 | NO | N/A |
| ARLG-3218   | Yes | KPC2 | NO  | Negative | <i>K. pneumoniae</i> | <i>K. pneumoniae</i> | 1 | NO | N/A |



|           |     |      |     |          |                      |                      |   |     |     |
|-----------|-----|------|-----|----------|----------------------|----------------------|---|-----|-----|
| ARLG-3220 | Yes | KPC2 | YES | Positive | <i>K. pneumoniae</i> | <i>K. pneumoniae</i> | 1 | NO  | N/A |
| ARLG-3222 | Yes | KPC2 | YES | Positive | <i>K. pneumoniae</i> | <i>K. pneumoniae</i> | 1 | NO  | N/A |
| ARLG-3223 | Yes | KPC2 | YES | Positive | <i>K. pneumoniae</i> | <i>K. pneumoniae</i> | 1 | NO  | N/A |
| ARLG-3224 | Yes | KPC2 | YES | Positive | <i>K. pneumoniae</i> | <i>K. pneumoniae</i> | 1 | YES | 1   |
| ARLG-3226 | Yes | KPC3 | YES | Positive | <i>K. pneumoniae</i> | <i>K. pneumoniae</i> | 1 | NO  | N/A |
| ARLG-3234 | Yes | KPC2 | YES | Positive | <i>K. pneumoniae</i> | <i>K. pneumoniae</i> | 1 | NO  | N/A |
| ARLG-3235 | Yes | KPC2 | YES | Positive | <i>K. pneumoniae</i> | <i>K. pneumoniae</i> | 1 | NO  | N/A |
| ARLG-3237 | Yes | KPC2 | YES | Positive | <i>K. pneumoniae</i> | <i>K. pneumoniae</i> | 1 | NO  | N/A |
| ARLG-3239 | Yes | KPC3 | NO  | Negative | <i>K. pneumoniae</i> | <i>K. pneumoniae</i> | 1 | NO  | N/A |
| ARLG-3240 | Yes | KPC2 | NO  | Negative | <i>K. pneumoniae</i> | <i>K. pneumoniae</i> | 1 | NO  | N/A |
| ARLG-3241 | Yes | KPC2 | YES | Positive | <i>K. pneumoniae</i> | <i>K. pneumoniae</i> | 1 | NO  | N/A |
| ARLG-3242 | Yes | KPC2 | NO  | Negative | <i>K. pneumoniae</i> | <i>K. pneumoniae</i> | 1 | NO  | N/A |
| ARLG-3245 | Yes | KPC2 | YES | Positive | <i>K. pneumoniae</i> | <i>K. pneumoniae</i> | 1 | NO  | N/A |
| ARLG-3247 | Yes | KPC2 | YES | Positive | <i>K. pneumoniae</i> | <i>K. pneumoniae</i> | 1 | NO  | N/A |
| ARLG-3251 | Yes | KPC2 | YES | Positive | <i>K. pneumoniae</i> | <i>K. pneumoniae</i> | 1 | NO  | N/A |
| ARLG-3254 | Yes | KPC2 | YES | Positive | <i>K. pneumoniae</i> | <i>K. pneumoniae</i> | 1 | NO  | N/A |
| ARLG-3255 | Yes | KPC2 | NO  | Negative | <i>K. pneumoniae</i> | <i>K. pneumoniae</i> | 1 | NO  | N/A |
| ARLG-3256 | Yes | KPC2 | YES | Positive | <i>K. pneumoniae</i> | <i>K. pneumoniae</i> | 1 | NO  | N/A |
| ARLG-3260 | Yes | KPC2 | YES | Positive | <i>K. pneumoniae</i> | <i>K. pneumoniae</i> | 1 | NO  | N/A |
| ARLG-3261 | Yes | KPC2 | YES | Positive | <i>K. pneumoniae</i> | <i>K. pneumoniae</i> | 1 | YES | 1   |
| ARLG-3274 | No  | N/A  | NO  | Negative | <i>K. pneumoniae</i> | <i>K. pneumoniae</i> | 1 | NO  | N/A |
| ARLG-3275 | No  | N/A  | NO  | Negative | <i>K. pneumoniae</i> | <i>K. pneumoniae</i> | 1 | NO  | N/A |
| ARLG-3276 | No  | N/A  | NO  | Negative | <i>K. pneumoniae</i> | <i>K. pneumoniae</i> | 1 | NO  | N/A |
| ARLG-3285 | No  | N/A  | NO  | Negative | <i>K. pneumoniae</i> | <i>K. pneumoniae</i> | 1 | NO  | N/A |
| ARLG-3289 | Yes | KPC2 | NO  | Negative | <i>K. pneumoniae</i> | <i>K. pneumoniae</i> | 1 | NO  | N/A |
| ARLG-3294 | Yes | KPC3 | NO  | Negative | <i>K. pneumoniae</i> | <i>K. pneumoniae</i> | 1 | NO  | N/A |
| ARLG-3297 | Yes | KPC3 | NO  | Negative | <i>K. pneumoniae</i> | <i>K. pneumoniae</i> | 1 | NO  | N/A |
| ARLG-3303 | Yes | KPC3 | NO  | Negative | <i>K. pneumoniae</i> | <i>K. pneumoniae</i> | 1 | NO  | N/A |
| ARLG-3304 | Yes | KPC2 | YES | Positive | <i>K. pneumoniae</i> | <i>K. pneumoniae</i> | 1 | NO  | N/A |
| ARLG-3310 | Yes | KPC2 | YES | Positive | <i>K. pneumoniae</i> | <i>K. pneumoniae</i> | 1 | NO  | N/A |

|           |     |      |     |          |                      |                      |   |    |     |
|-----------|-----|------|-----|----------|----------------------|----------------------|---|----|-----|
| ARLG-3311 | Yes | KPC2 | YES | Positive | <i>K. pneumoniae</i> | <i>K. pneumoniae</i> | 1 | NO | N/A |
| ARLG-3312 | Yes | KPC2 | YES | Positive | <i>K. pneumoniae</i> | <i>K. pneumoniae</i> | 1 | NO | N/A |
| ARLG-3317 | Yes | KPC2 | NO  | Negative | <i>K. pneumoniae</i> | <i>K. pneumoniae</i> | 1 | NO | N/A |
| ARLG-3319 | Yes | KPC2 | YES | Positive | <i>K. pneumoniae</i> | <i>K. pneumoniae</i> | 1 | NO | N/A |
| ARLG-3320 | No  | N/A  | NO  | Negative | <i>K. pneumoniae</i> | <i>K. pneumoniae</i> | 1 | NO | N/A |
| ARLG-3321 | Yes | KPC2 | NO  | Negative | <i>K. pneumoniae</i> | <i>K. pneumoniae</i> | 1 | NO | N/A |
| ARLG-3322 | Yes | KPC2 | NO  | Negative | <i>K. pneumoniae</i> | <i>K. pneumoniae</i> | 1 | NO | N/A |
| ARLG-3323 | Yes | KPC3 | NO  | Negative | <i>K. pneumoniae</i> | <i>K. pneumoniae</i> | 1 | NO | N/A |
| ARLG-3328 | Yes | KPC2 | NO  | Negative | <i>K. pneumoniae</i> | <i>K. pneumoniae</i> | 1 | NO | N/A |
| ARLG-3332 | Yes | KPC2 | YES | Positive | <i>K. pneumoniae</i> | <i>K. pneumoniae</i> | 1 | NO | N/A |
| ARLG-3340 | No  | N/A  | NO  | Negative | <i>K. pneumoniae</i> | <i>K. pneumoniae</i> | 1 | NO | N/A |
| ARLG-3342 | Yes | KPC3 | NO  | Negative | <i>K. pneumoniae</i> | <i>K. pneumoniae</i> | 1 | NO | N/A |
| ARLG-3343 | Yes | KPC3 | NO  | Negative | <i>K. pneumoniae</i> | <i>K. pneumoniae</i> | 1 | NO | N/A |
| ARLG-3344 | Yes | KPC3 | NO  | Negative | <i>K. pneumoniae</i> | <i>K. pneumoniae</i> | 1 | NO | N/A |
| ARLG-3346 | Yes | KPC3 | NO  | Negative | <i>K. pneumoniae</i> | <i>K. pneumoniae</i> | 1 | NO | N/A |
| ARLG-3348 | Yes | KPC3 | NO  | Negative | <i>K. pneumoniae</i> | <i>K. pneumoniae</i> | 1 | NO | N/A |
| ARLG-3352 | Yes | KPC3 | NO  | Negative | <i>K. pneumoniae</i> | <i>K. pneumoniae</i> | 1 | NO | N/A |
| ARLG-3353 | Yes | KPC3 | NO  | Negative | <i>K. pneumoniae</i> | <i>K. pneumoniae</i> | 1 | NO | N/A |
| ARLG-3354 | Yes | KPC3 | NO  | Negative | <i>K. pneumoniae</i> | <i>K. pneumoniae</i> | 1 | NO | N/A |
| ARLG-3355 | No  | N/A  | NO  | Negative | <i>K. pneumoniae</i> | <i>K. pneumoniae</i> | 1 | NO | N/A |
| ARLG-3357 | No  | N/A  | NO  | Negative | <i>K. pneumoniae</i> | <i>K. pneumoniae</i> | 1 | NO | N/A |
| ARLG-3358 | Yes | KPC3 | NO  | Negative | <i>K. pneumoniae</i> | <i>K. pneumoniae</i> | 1 | NO | N/A |
| ARLG-3359 | Yes | KPC3 | NO  | Negative | <i>K. pneumoniae</i> | <i>K. pneumoniae</i> | 1 | NO | N/A |
| ARLG-3361 | Yes | KPC3 | NO  | Negative | <i>K. pneumoniae</i> | <i>K. pneumoniae</i> | 1 | NO | N/A |
| ARLG-3364 | Yes | KPC2 | YES | Positive | <i>K. pneumoniae</i> | <i>K. pneumoniae</i> | 1 | NO | N/A |
| ARLG-3365 | Yes | KPC3 | NO  | Negative | <i>K. pneumoniae</i> | <i>K. pneumoniae</i> | 1 | NO | N/A |
| ARLG-3367 | Yes | KPC3 | NO  | Negative | <i>K. pneumoniae</i> | <i>K. pneumoniae</i> | 1 | NO | N/A |
| ARLG-3368 | Yes | KPC3 | NO  | Negative | <i>K. pneumoniae</i> | <i>K. pneumoniae</i> | 1 | NO | N/A |
| ARLG-3370 | Yes | KPC2 | YES | Positive | <i>K. pneumoniae</i> | <i>K. pneumoniae</i> | 1 | NO | N/A |
| ARLG-3371 | Yes | KPC2 | YES | Positive | <i>K. pneumoniae</i> | <i>K. pneumoniae</i> | 1 | NO | N/A |

|           |     |      |     |          |                      |                      |   |    |     |
|-----------|-----|------|-----|----------|----------------------|----------------------|---|----|-----|
| ARLG-3374 | Yes | KPC3 | NO  | Negative | <i>K. pneumoniae</i> | <i>K. pneumoniae</i> | 1 | NO | N/A |
| ARLG-3375 | Yes | KPC2 | NO  | Negative | <i>K. pneumoniae</i> | <i>K. pneumoniae</i> | 1 | NO | N/A |
| ARLG-3379 | Yes | KPC2 | YES | Positive | <i>K. pneumoniae</i> | <i>K. pneumoniae</i> | 1 | NO | N/A |
| ARLG-3381 | No  | N/A  | NO  | Negative | <i>K. pneumoniae</i> | <i>K. pneumoniae</i> | 1 | NO | N/A |
| ARLG-3383 | Yes | KPC2 | NO  | Negative | <i>K. pneumoniae</i> | <i>K. pneumoniae</i> | 1 | NO | N/A |
| ARLG-3394 | No  | N/A  | NO  | Negative | <i>K. pneumoniae</i> | <i>K. pneumoniae</i> | 1 | NO | N/A |
| ARLG-3400 | No  | N/A  | NO  | Negative | <i>K. pneumoniae</i> | <i>K. pneumoniae</i> | 1 | NO | N/A |
| ARLG-3401 | No  | N/A  | NO  | Negative | <i>K. pneumoniae</i> | <i>K. pneumoniae</i> | 1 | NO | N/A |
| ARLG-3408 | Yes | KPC2 | YES | Positive | <i>K. pneumoniae</i> | <i>K. pneumoniae</i> | 1 | NO | N/A |
| ARLG-3412 | Yes | KPC2 | YES | Positive | <i>K. pneumoniae</i> | <i>K. pneumoniae</i> | 1 | NO | N/A |
| ARLG-3416 | No  | N/A  | NO  | Negative | <i>K. pneumoniae</i> | <i>K. pneumoniae</i> | 1 | NO | N/A |
| ARLG-3430 | No  | N/A  | NO  | Negative | <i>K. pneumoniae</i> | <i>K. pneumoniae</i> | 1 | NO | N/A |
| ARLG-3441 | No  | N/A  | NO  | Negative | <i>K. pneumoniae</i> | <i>K. pneumoniae</i> | 1 | NO | N/A |
| ARLG-3445 | No  | N/A  | NO  | Negative | <i>K. pneumoniae</i> | <i>K. pneumoniae</i> | 1 | NO | N/A |
| ARLG-3449 | No  | N/A  | NO  | Negative | <i>K. pneumoniae</i> | <i>K. pneumoniae</i> | 1 | NO | N/A |
| ARLG-3459 | No  | N/A  | NO  | Negative | <i>K. pneumoniae</i> | <i>K. pneumoniae</i> | 1 | NO | N/A |
| ARLG-3461 | No  | N/A  | NO  | Negative | <i>K. pneumoniae</i> | <i>K. pneumoniae</i> | 1 | NO | N/A |
| ARLG-3466 | Yes | KPC3 | NO  | Negative | <i>K. pneumoniae</i> | <i>K. pneumoniae</i> | 1 | NO | N/A |
| ARLG-3474 | No  | N/A  | NO  | Negative | <i>K. pneumoniae</i> | <i>K. pneumoniae</i> | 1 | NO | N/A |
| ARLG-3475 | No  | N/A  | NO  | Negative | <i>K. pneumoniae</i> | <i>K. pneumoniae</i> | 1 | NO | N/A |
| ARLG-3479 | Yes | KPC2 | YES | Positive | <i>K. pneumoniae</i> | <i>K. pneumoniae</i> | 1 | NO | N/A |
| ARLG-3480 | Yes | KPC2 | YES | Positive | <i>K. pneumoniae</i> | <i>K. pneumoniae</i> | 1 | NO | N/A |
| ARLG-4565 | Yes | KPC2 | YES | Positive | <i>K. pneumoniae</i> | <i>K. pneumoniae</i> | 1 | NO | N/A |
| ARLG-4567 | Yes | KPC2 | YES | Positive | <i>K. pneumoniae</i> | <i>K. pneumoniae</i> | 1 | NO | N/A |
| ARLG-4568 | Yes | KPC2 | NO  | Negative | <i>K. pneumoniae</i> | <i>K. pneumoniae</i> | 1 | NO | N/A |
| ARLG-4569 | Yes | KPC2 | YES | Positive | <i>K. pneumoniae</i> | <i>K. pneumoniae</i> | 1 | NO | N/A |
| ARLG-4570 | Yes | KPC2 | YES | Positive | <i>K. pneumoniae</i> | <i>K. pneumoniae</i> | 1 | NO | N/A |
| ARLG-4571 | Yes | KPC2 | YES | Positive | <i>K. pneumoniae</i> | <i>K. pneumoniae</i> | 1 | NO | N/A |
| ARLG-4574 | No  | N/A  | NO  | Negative | <i>K. pneumoniae</i> | <i>K. pneumoniae</i> | 1 | NO | N/A |
| ARLG-4575 | Yes | KPC2 | YES | Positive | <i>K. pneumoniae</i> | <i>K. pneumoniae</i> | 1 | NO | N/A |

|           |     |      |     |          |                      |                      |   |    |     |
|-----------|-----|------|-----|----------|----------------------|----------------------|---|----|-----|
| ARLG-4590 | Yes | KPC2 | YES | Positive | <i>K. pneumoniae</i> | <i>K. pneumoniae</i> | 1 | NO | N/A |
| ARLG-4591 | Yes | KPC3 | NO  | Negative | <i>K. pneumoniae</i> | <i>K. pneumoniae</i> | 1 | NO | N/A |
| ARLG-4592 | No  | N/A  | NO  | Negative | <i>K. pneumoniae</i> | <i>K. pneumoniae</i> | 1 | NO | N/A |
| ARLG-4593 | Yes | KPC3 | NO  | Negative | <i>K. pneumoniae</i> | <i>K. pneumoniae</i> | 1 | NO | N/A |
| ARLG-4595 | Yes | KPC3 | NO  | Negative | <i>K. pneumoniae</i> | <i>K. pneumoniae</i> | 1 | NO | N/A |
| ARLG-4604 | No  | N/A  | NO  | Negative | <i>K. pneumoniae</i> | <i>K. pneumoniae</i> | 1 | NO | N/A |
| ARLG-4605 | Yes | KPC2 | YES | Positive | <i>K. pneumoniae</i> | <i>K. pneumoniae</i> | 1 | NO | N/A |
| ARLG-4606 | No  | N/A  | NO  | Negative | <i>K. pneumoniae</i> | <i>K. pneumoniae</i> | 1 | NO | N/A |
| ARLG-4608 | No  | N/A  | NO  | Negative | <i>K. pneumoniae</i> | <i>K. pneumoniae</i> | 1 | NO | N/A |
| ARLG-4609 | No  | N/A  | NO  | Negative | <i>K. pneumoniae</i> | <i>K. pneumoniae</i> | 1 | NO | N/A |
| ARLG-4612 | Yes | KPC3 | NO  | Negative | <i>K. pneumoniae</i> | <i>K. pneumoniae</i> | 1 | NO | N/A |
| ARLG-4616 | Yes | KPC3 | NO  | Negative | <i>K. pneumoniae</i> | <i>K. pneumoniae</i> | 1 | NO | N/A |
| ARLG-4617 | Yes | KPC3 | NO  | Negative | <i>K. pneumoniae</i> | <i>K. pneumoniae</i> | 1 | NO | N/A |
| ARLG-4618 | Yes | KPC3 | NO  | Negative | <i>K. pneumoniae</i> | <i>K. pneumoniae</i> | 1 | NO | N/A |
| ARLG-4619 | Yes | KPC3 | NO  | Negative | <i>K. pneumoniae</i> | <i>K. pneumoniae</i> | 1 | NO | N/A |
| ARLG-4621 | Yes | KPC3 | NO  | Negative | <i>K. pneumoniae</i> | <i>K. pneumoniae</i> | 1 | NO | N/A |
| ARLG-4622 | Yes | KPC2 | NO  | Negative | <i>K. pneumoniae</i> | <i>K. pneumoniae</i> | 1 | NO | N/A |
| ARLG-4623 | Yes | KPC2 | YES | Positive | <i>K. pneumoniae</i> | <i>K. pneumoniae</i> | 1 | NO | N/A |
| ARLG-4624 | Yes | KPC2 | YES | Positive | <i>K. pneumoniae</i> | <i>K. pneumoniae</i> | 1 | NO | N/A |
| ARLG-4626 | No  | N/A  | NO  | Negative | <i>K. pneumoniae</i> | <i>K. pneumoniae</i> | 1 | NO | N/A |
| ARLG-4627 | Yes | KPC3 | NO  | Negative | <i>K. pneumoniae</i> | <i>K. pneumoniae</i> | 1 | NO | N/A |
| ARLG-4632 | No  | N/A  | NO  | Negative | <i>K. pneumoniae</i> | <i>K. pneumoniae</i> | 1 | NO | N/A |
| ARLG-4633 | Yes | KPC2 | NO  | Negative | <i>K. pneumoniae</i> | <i>K. pneumoniae</i> | 1 | NO | N/A |
| ARLG-4635 | Yes | KPC3 | NO  | Negative | <i>K. pneumoniae</i> | <i>K. pneumoniae</i> | 1 | NO | N/A |
| ARLG-4637 | Yes | KPC3 | NO  | Negative | <i>K. pneumoniae</i> | <i>K. pneumoniae</i> | 1 | NO | N/A |
| ARLG-4639 | Yes | KPC3 | NO  | Negative | <i>K. pneumoniae</i> | <i>K. pneumoniae</i> | 1 | NO | N/A |
| ARLG-4640 | Yes | KPC3 | NO  | Negative | <i>K. pneumoniae</i> | <i>K. pneumoniae</i> | 1 | NO | N/A |
| ARLG-4641 | Yes | KPC3 | NO  | Negative | <i>K. pneumoniae</i> | <i>K. pneumoniae</i> | 1 | NO | N/A |
| ARLG-4642 | Yes | KPC2 | NO  | Negative | <i>K. pneumoniae</i> | <i>K. pneumoniae</i> | 1 | NO | N/A |
| ARLG-4643 | Yes | KPC3 | NO  | Negative | <i>K. pneumoniae</i> | <i>K. pneumoniae</i> | 1 | NO | N/A |

|           |     |      |     |          |                      |                      |   |    |     |
|-----------|-----|------|-----|----------|----------------------|----------------------|---|----|-----|
| ARLG-4645 | Yes | KPC3 | NO  | Negative | <i>K. pneumoniae</i> | <i>K. pneumoniae</i> | 1 | NO | N/A |
| ARLG-4646 | Yes | KPC2 | NO  | Negative | <i>K. pneumoniae</i> | <i>K. pneumoniae</i> | 1 | NO | N/A |
| ARLG-4647 | Yes | KPC2 | YES | Positive | <i>K. pneumoniae</i> | <i>K. pneumoniae</i> | 1 | NO | N/A |
| ARLG-4650 | No  | N/A  | NO  | Negative | <i>K. pneumoniae</i> | <i>K. pneumoniae</i> | 1 | NO | N/A |
| ARLG-4651 | Yes | KPC3 | NO  | Negative | <i>K. pneumoniae</i> | <i>K. pneumoniae</i> | 1 | NO | N/A |
| ARLG-4653 | Yes | KPC3 | NO  | Negative | <i>K. pneumoniae</i> | <i>K. pneumoniae</i> | 1 | NO | N/A |
| ARLG-4654 | Yes | KPC3 | NO  | Negative | <i>K. pneumoniae</i> | <i>K. pneumoniae</i> | 1 | NO | N/A |
| ARLG-4655 | Yes | KPC2 | NO  | Negative | <i>K. pneumoniae</i> | <i>K. pneumoniae</i> | 1 | NO | N/A |
| ARLG-4656 | Yes | KPC3 | NO  | Negative | <i>K. pneumoniae</i> | <i>K. pneumoniae</i> | 1 | NO | N/A |
| ARLG-4657 | Yes | KPC3 | YES | Positive | <i>K. pneumoniae</i> | <i>K. pneumoniae</i> | 1 | NO | N/A |
| ARLG-4658 | Yes | KPC3 | NO  | Negative | <i>K. pneumoniae</i> | <i>K. pneumoniae</i> | 1 | NO | N/A |
| ARLG-4661 | No  | N/A  | NO  | Negative | <i>K. pneumoniae</i> | <i>K. pneumoniae</i> | 1 | NO | N/A |
| ARLG-4662 | Yes | KPC3 | NO  | Negative | <i>K. pneumoniae</i> | <i>K. pneumoniae</i> | 1 | NO | N/A |
| ARLG-4666 | Yes | KPC2 | NO  | Negative | <i>K. pneumoniae</i> | <i>K. pneumoniae</i> | 1 | NO | N/A |
| ARLG-4667 | Yes | KPC2 | YES | Positive | <i>K. pneumoniae</i> | <i>K. pneumoniae</i> | 1 | NO | N/A |
| ARLG-4668 | Yes | KPC2 | YES | Positive | <i>K. pneumoniae</i> | <i>K. pneumoniae</i> | 1 | NO | N/A |
| ARLG-4669 | No  | N/A  | NO  | Negative | <i>K. pneumoniae</i> | <i>K. pneumoniae</i> | 1 | NO | N/A |
| ARLG-4670 | No  | N/A  | NO  | Negative | <i>K. pneumoniae</i> | <i>K. pneumoniae</i> | 1 | NO | N/A |
| ARLG-4671 | Yes | KPC2 | YES | Positive | <i>K. pneumoniae</i> | <i>K. pneumoniae</i> | 1 | NO | N/A |
| ARLG-4672 | Yes | KPC3 | NO  | Negative | <i>K. pneumoniae</i> | <i>K. pneumoniae</i> | 1 | NO | N/A |
| ARLG-4673 | Yes | KPC2 | YES | Positive | <i>K. pneumoniae</i> | <i>K. pneumoniae</i> | 1 | NO | N/A |
| ARLG-4674 | Yes | KPC3 | NO  | Negative | <i>K. pneumoniae</i> | <i>K. pneumoniae</i> | 1 | NO | N/A |
| ARLG-4675 | Yes | KPC3 | NO  | Negative | <i>K. pneumoniae</i> | <i>K. pneumoniae</i> | 1 | NO | N/A |
| ARLG-4676 | Yes | KPC3 | NO  | Negative | <i>K. pneumoniae</i> | <i>K. pneumoniae</i> | 1 | NO | N/A |
| ARLG-4682 | Yes | KPC2 | YES | Positive | <i>K. pneumoniae</i> | <i>K. pneumoniae</i> | 1 | NO | N/A |
| ARLG-4683 | Yes | KPC2 | YES | Positive | <i>K. pneumoniae</i> | <i>K. pneumoniae</i> | 1 | NO | N/A |
| ARLG-4684 | Yes | KPC3 | NO  | Negative | <i>K. pneumoniae</i> | <i>K. pneumoniae</i> | 1 | NO | N/A |
| ARLG-4686 | Yes | KPC3 | NO  | Negative | <i>K. pneumoniae</i> | <i>K. pneumoniae</i> | 1 | NO | N/A |
| ARLG-4691 | Yes | KPC3 | NO  | Negative | <i>K. pneumoniae</i> | <i>K. pneumoniae</i> | 1 | NO | N/A |
| ARLG-4692 | Yes | KPC3 | NO  | Negative | <i>K. pneumoniae</i> | <i>K. pneumoniae</i> | 1 | NO | N/A |

|           |     |      |     |          |                      |                      |   |    |     |
|-----------|-----|------|-----|----------|----------------------|----------------------|---|----|-----|
| ARLG-4693 | Yes | KPC3 | NO  | Negative | <i>K. pneumoniae</i> | <i>K. pneumoniae</i> | 1 | NO | N/A |
| ARLG-4694 | Yes | KPC3 | NO  | Negative | <i>K. pneumoniae</i> | <i>K. pneumoniae</i> | 1 | NO | N/A |
| ARLG-4696 | Yes | KPC3 | NO  | Negative | <i>K. pneumoniae</i> | <i>K. pneumoniae</i> | 1 | NO | N/A |
| ARLG-4697 | Yes | KPC2 | YES | Positive | <i>K. pneumoniae</i> | <i>K. pneumoniae</i> | 1 | NO | N/A |
| ARLG-4698 | No  | N/A  | NO  | Negative | <i>K. pneumoniae</i> | <i>K. pneumoniae</i> | 1 | NO | N/A |
| ARLG-4703 | Yes | KPC2 | NO  | Negative | <i>K. pneumoniae</i> | <i>K. pneumoniae</i> | 1 | NO | N/A |
| ARLG-4704 | Yes | KPC3 | NO  | Negative | <i>K. pneumoniae</i> | <i>K. pneumoniae</i> | 1 | NO | N/A |
| ARLG-4706 | Yes | KPC2 | NO  | Negative | <i>K. pneumoniae</i> | <i>K. pneumoniae</i> | 1 | NO | N/A |
| ARLG-4707 | Yes | KPC2 | YES | Positive | <i>K. pneumoniae</i> | <i>K. pneumoniae</i> | 1 | NO | N/A |
| ARLG-4709 | Yes | KPC3 | NO  | Negative | <i>K. pneumoniae</i> | <i>K. pneumoniae</i> | 1 | NO | N/A |
| ARLG-4710 | Yes | KPC2 | NO  | Negative | <i>K. pneumoniae</i> | <i>K. pneumoniae</i> | 1 | NO | N/A |
| ARLG-4711 | No  | N/A  | NO  | Negative | <i>K. pneumoniae</i> | <i>K. pneumoniae</i> | 1 | NO | N/A |
| ARLG-4712 | No  | N/A  | NO  | Negative | <i>K. pneumoniae</i> | <i>K. pneumoniae</i> | 1 | NO | N/A |
| ARLG-4716 | Yes | KPC3 | NO  | Negative | <i>K. pneumoniae</i> | <i>K. pneumoniae</i> | 1 | NO | N/A |
| ARLG-4720 | No  | N/A  | NO  | Negative | <i>K. pneumoniae</i> | <i>K. pneumoniae</i> | 1 | NO | N/A |
| ARLG-4723 | Yes | KPC2 | NO  | Negative | <i>K. pneumoniae</i> | <i>K. pneumoniae</i> | 1 | NO | N/A |
| ARLG-4728 | No  | N/A  | NO  | Negative | <i>K. pneumoniae</i> | <i>K. pneumoniae</i> | 1 | NO | N/A |
| ARLG-4729 | No  | N/A  | NO  | Negative | <i>K. pneumoniae</i> | <i>K. pneumoniae</i> | 1 | NO | N/A |
| ARLG-4730 | No  | N/A  | NO  | Negative | <i>K. pneumoniae</i> | <i>K. pneumoniae</i> | 1 | NO | N/A |
| ARLG-4743 | No  | N/A  | NO  | Negative | <i>K. pneumoniae</i> | <i>K. pneumoniae</i> | 1 | NO | N/A |
| ARLG-4744 | No  | N/A  | NO  | Negative | <i>K. pneumoniae</i> | <i>K. pneumoniae</i> | 1 | NO | N/A |
| ARLG-4747 | No  | N/A  | NO  | Negative | <i>K. pneumoniae</i> | <i>K. pneumoniae</i> | 1 | NO | N/A |
| ARLG-4749 | Yes | KPC2 | NO  | Negative | <i>K. pneumoniae</i> | <i>K. pneumoniae</i> | 1 | NO | N/A |
| ARLG-4751 | Yes | KPC2 | NO  | Negative | <i>K. pneumoniae</i> | <i>K. pneumoniae</i> | 1 | NO | N/A |
| ARLG-4752 | Yes | KPC3 | NO  | Negative | <i>K. pneumoniae</i> | <i>K. pneumoniae</i> | 1 | NO | N/A |
| ARLG-4753 | Yes | KPC2 | NO  | Negative | <i>K. pneumoniae</i> | <i>K. pneumoniae</i> | 1 | NO | N/A |
| ARLG-4756 | Yes | KPC2 | NO  | Negative | <i>K. pneumoniae</i> | <i>K. pneumoniae</i> | 1 | NO | N/A |
| ARLG-4758 | Yes | KPC3 | NO  | Negative | <i>K. pneumoniae</i> | <i>K. pneumoniae</i> | 1 | NO | N/A |
| ARLG-4759 | No  | N/A  | NO  | Negative | <i>K. pneumoniae</i> | <i>K. pneumoniae</i> | 1 | NO | N/A |
| ARLG-4760 | Yes | KPC3 | NO  | Negative | <i>K. pneumoniae</i> | <i>K. pneumoniae</i> | 1 | NO | N/A |

|           |     |      |     |          |                      |                      |   |     |     |
|-----------|-----|------|-----|----------|----------------------|----------------------|---|-----|-----|
| ARLG-4764 | No  | N/A  | NO  | Negative | <i>K. pneumoniae</i> | <i>K. pneumoniae</i> | 1 | NO  | N/A |
| ARLG-4766 | Yes | KPC3 | NO  | Negative | <i>K. pneumoniae</i> | <i>K. pneumoniae</i> | 1 | NO  | N/A |
| ARLG-4767 | No  | N/A  | NO  | Negative | <i>K. pneumoniae</i> | <i>K. pneumoniae</i> | 1 | NO  | N/A |
| ARLG-4768 | No  | N/A  | NO  | Negative | <i>K. pneumoniae</i> | <i>K. pneumoniae</i> | 1 | NO  | N/A |
| ARLG-4771 | No  | N/A  | NO  | Negative | <i>K. pneumoniae</i> | <i>K. pneumoniae</i> | 1 | NO  | N/A |
| ARLG-4777 | No  | N/A  | NO  | Negative | <i>K. pneumoniae</i> | <i>K. pneumoniae</i> | 1 | NO  | N/A |
| ARLG-4783 | No  | N/A  | NO  | Negative | <i>K. pneumoniae</i> | <i>K. pneumoniae</i> | 1 | NO  | N/A |
| ARLG-4793 | No  | N/A  | NO  | Negative | <i>K. pneumoniae</i> | <i>K. pneumoniae</i> | 1 | NO  | N/A |
| ARLG-4794 | Yes | KPC3 | NO  | Negative | <i>K. pneumoniae</i> | <i>K. pneumoniae</i> | 1 | NO  | N/A |
| ARLG-4796 | No  | N/A  | NO  | Negative | <i>K. pneumoniae</i> | <i>K. pneumoniae</i> | 1 | NO  | N/A |
| ARLG-4798 | Yes | KPC2 | NO  | Negative | <i>K. pneumoniae</i> | <i>K. pneumoniae</i> | 1 | NO  | N/A |
| ARLG-4802 | No  | N/A  | NO  | Negative | <i>K. pneumoniae</i> | <i>K. pneumoniae</i> | 1 | NO  | N/A |
| ARLG-4803 | No  | N/A  | NO  | Negative | <i>K. pneumoniae</i> | <i>K. pneumoniae</i> | 1 | NO  | N/A |
| ARLG-4806 | Yes | KPC3 | NO  | Negative | <i>K. pneumoniae</i> | <i>K. pneumoniae</i> | 1 | NO  | N/A |
| ARLG-4807 | Yes | KPC2 | YES | Positive | <i>K. pneumoniae</i> | <i>K. pneumoniae</i> | 1 | YES | 2   |
| ARLG-4808 | No  | N/A  | NO  | Negative | <i>K. pneumoniae</i> | <i>K. pneumoniae</i> | 1 | NO  | N/A |
| ARLG-4809 | Yes | KPC3 | NO  | Negative | <i>K. pneumoniae</i> | <i>K. pneumoniae</i> | 1 | NO  | N/A |
| ARLG-4810 | Yes | KPC2 | YES | Positive | <i>K. pneumoniae</i> | <i>K. pneumoniae</i> | 1 | NO  | N/A |
| ARLG-4812 | Yes | KPC2 | YES | Positive | <i>K. pneumoniae</i> | <i>K. pneumoniae</i> | 1 | NO  | N/A |
| ARLG-4814 | Yes | KPC2 | NO  | Negative | <i>K. pneumoniae</i> | <i>K. pneumoniae</i> | 1 | NO  | N/A |
| ARLG-4815 | Yes | KPC2 | YES | Positive | <i>K. pneumoniae</i> | <i>K. pneumoniae</i> | 1 | YES | 1   |
| ARLG-4817 | Yes | KPC3 | NO  | Negative | <i>K. pneumoniae</i> | <i>K. pneumoniae</i> | 1 | NO  | N/A |
| ARLG-4818 | Yes | KPC2 | YES | Positive | <i>K. pneumoniae</i> | <i>K. pneumoniae</i> | 1 | NO  | N/A |
| ARLG-4819 | Yes | KPC2 | YES | Positive | <i>K. pneumoniae</i> | <i>K. pneumoniae</i> | 1 | NO  | N/A |
| ARLG-4830 | Yes | KPC3 | NO  | Negative | <i>K. pneumoniae</i> | <i>K. pneumoniae</i> | 1 | NO  | N/A |
| ARLG-4832 | Yes | KPC2 | NO  | Negative | <i>K. pneumoniae</i> | <i>K. pneumoniae</i> | 1 | NO  | N/A |
| ARLG-4833 | Yes | KPC2 | NO  | Negative | <i>K. pneumoniae</i> | <i>K. pneumoniae</i> | 1 | NO  | N/A |
| ARLG-4834 | Yes | KPC2 | YES | Positive | <i>K. pneumoniae</i> | <i>K. pneumoniae</i> | 1 | NO  | N/A |
| ARLG-4842 | Yes | KPC2 | YES | Positive | <i>K. pneumoniae</i> | <i>K. pneumoniae</i> | 1 | NO  | N/A |
| ARLG-4843 | Yes | KPC2 | YES | Positive | <i>K. pneumoniae</i> | <i>K. pneumoniae</i> | 1 | NO  | N/A |



|           |     |      |     |          |                      |                      |   |     |     |
|-----------|-----|------|-----|----------|----------------------|----------------------|---|-----|-----|
| ARLG-4844 | No  | N/A  | NO  | Negative | <i>K. pneumoniae</i> | <i>K. pneumoniae</i> | 1 | NO  | N/A |
| ARLG-4847 | Yes | KPC2 | YES | Positive | <i>K. pneumoniae</i> | <i>K. pneumoniae</i> | 1 | NO  | N/A |
| ARLG-4849 | Yes | KPC2 | YES | Positive | <i>K. pneumoniae</i> | <i>K. pneumoniae</i> | 1 | NO  | N/A |
| ARLG-4850 | No  | N/A  | NO  | Negative | <i>K. pneumoniae</i> | <i>K. pneumoniae</i> | 1 | NO  | N/A |
| ARLG-4851 | No  | N/A  | NO  | Negative | <i>K. pneumoniae</i> | <i>K. pneumoniae</i> | 1 | NO  | N/A |
| ARLG-4855 | Yes | KPC2 | YES | Positive | <i>K. pneumoniae</i> | <i>K. pneumoniae</i> | 1 | NO  | N/A |
| ARLG-4856 | Yes | KPC2 | YES | Positive | <i>K. pneumoniae</i> | <i>K. pneumoniae</i> | 1 | NO  | N/A |
| ARLG-4857 | Yes | KPC2 | YES | Positive | <i>K. pneumoniae</i> | <i>K. pneumoniae</i> | 1 | NO  | N/A |
| ARLG-4859 | Yes | KPC2 | YES | Positive | <i>K. pneumoniae</i> | <i>K. pneumoniae</i> | 1 | NO  | N/A |
| ARLG-4860 | Yes | KPC2 | YES | Positive | <i>K. pneumoniae</i> | <i>K. pneumoniae</i> | 1 | NO  | N/A |
| ARLG-4861 | Yes | KPC3 | NO  | Negative | <i>K. pneumoniae</i> | <i>K. pneumoniae</i> | 1 | NO  | N/A |
| ARLG-4864 | Yes | KPC2 | YES | Positive | <i>K. pneumoniae</i> | <i>K. pneumoniae</i> | 1 | NO  | N/A |
| ARLG-4865 | No  | N/A  | NO  | Negative | <i>K. pneumoniae</i> | <i>K. pneumoniae</i> | 1 | NO  | N/A |
| ARLG-4866 | Yes | KPC2 | YES | Positive | <i>K. pneumoniae</i> | <i>K. pneumoniae</i> | 1 | NO  | N/A |
| ARLG-4870 | Yes | KPC2 | YES | Positive | <i>K. pneumoniae</i> | <i>K. pneumoniae</i> | 1 | YES | 1   |
| ARLG-4871 | Yes | KPC2 | YES | Negative | <i>K. pneumoniae</i> | <i>K. pneumoniae</i> | 1 | NO  | N/A |
| ARLG-4872 | Yes | KPC2 | YES | Positive | <i>K. pneumoniae</i> | <i>K. pneumoniae</i> | 1 | YES | 1   |
| ARLG-4875 | Yes | KPC2 | YES | Positive | <i>K. pneumoniae</i> | <i>K. pneumoniae</i> | 1 | NO  | N/A |
| ARLG-4877 | Yes | KPC2 | YES | Positive | <i>K. pneumoniae</i> | <i>K. pneumoniae</i> | 1 | NO  | N/A |
| ARLG-4878 | Yes | KPC2 | YES | Positive | <i>K. pneumoniae</i> | <i>K. pneumoniae</i> | 1 | NO  | N/A |
| ARLG-4879 | Yes | KPC2 | NO  | Negative | <i>K. pneumoniae</i> | <i>K. pneumoniae</i> | 1 | NO  | N/A |
| ARLG-4880 | Yes | KPC2 | YES | Positive | <i>K. pneumoniae</i> | <i>K. pneumoniae</i> | 1 | NO  | N/A |
| ARLG-4882 | Yes | KPC2 | YES | Positive | <i>K. pneumoniae</i> | <i>K. pneumoniae</i> | 1 | NO  | N/A |
| ARLG-4883 | Yes | KPC3 | NO  | Negative | <i>K. pneumoniae</i> | <i>K. pneumoniae</i> | 1 | NO  | N/A |
| ARLG-4884 | Yes | KPC3 | NO  | Negative | <i>K. pneumoniae</i> | <i>K. pneumoniae</i> | 1 | NO  | N/A |
| ARLG-4885 | Yes | KPC2 | YES | Positive | <i>K. pneumoniae</i> | <i>K. pneumoniae</i> | 1 | NO  | N/A |
| ARLG-4886 | Yes | KPC3 | NO  | Negative | <i>K. pneumoniae</i> | <i>K. pneumoniae</i> | 1 | NO  | N/A |
| ARLG-4887 | Yes | KPC2 | YES | Positive | <i>K. pneumoniae</i> | <i>K. pneumoniae</i> | 1 | NO  | N/A |
| ARLG-4888 | Yes | KPC2 | YES | Positive | <i>K. pneumoniae</i> | <i>K. pneumoniae</i> | 1 | NO  | N/A |
| ARLG-4889 | Yes | KPC2 | YES | Positive | <i>K. pneumoniae</i> | <i>K. pneumoniae</i> | 1 | NO  | N/A |



|           |     |      |     |          |                      |                      |   |    |     |
|-----------|-----|------|-----|----------|----------------------|----------------------|---|----|-----|
| ARLG-4890 | Yes | KPC2 | YES | Positive | <i>K. pneumoniae</i> | <i>K. pneumoniae</i> | 1 | NO | N/A |
| ARLG-4891 | Yes | KPC3 | NO  | Negative | <i>K. pneumoniae</i> | <i>K. pneumoniae</i> | 1 | NO | N/A |
| ARLG-4892 | Yes | KPC3 | NO  | Negative | <i>K. pneumoniae</i> | <i>K. pneumoniae</i> | 1 | NO | N/A |
| ARLG-4893 | Yes | KPC2 | YES | Positive | <i>K. pneumoniae</i> | <i>K. pneumoniae</i> | 1 | NO | N/A |
| ARLG-4896 | Yes | KPC2 | YES | Positive | <i>K. pneumoniae</i> | <i>K. pneumoniae</i> | 1 | NO | N/A |
| ARLG-4898 | Yes | KPC3 | NO  | Negative | <i>K. pneumoniae</i> | <i>K. pneumoniae</i> | 1 | NO | N/A |
| ARLG-4899 | Yes | KPC3 | NO  | Negative | <i>K. pneumoniae</i> | <i>K. pneumoniae</i> | 1 | NO | N/A |
| ARLG-4903 | Yes | KPC2 | YES | Positive | <i>K. pneumoniae</i> | <i>K. pneumoniae</i> | 1 | NO | N/A |
| ARLG-4906 | No  | N/A  | NO  | Negative | <i>K. pneumoniae</i> | <i>K. pneumoniae</i> | 1 | NO | N/A |
| ARLG-4907 | Yes | KPC3 | NO  | Negative | <i>K. pneumoniae</i> | <i>K. pneumoniae</i> | 1 | NO | N/A |
| ARLG-4908 | No  | N/A  | NO  | Negative | <i>K. pneumoniae</i> | <i>K. pneumoniae</i> | 1 | NO | N/A |
| ARLG-4912 | Yes | KPC3 | NO  | Negative | <i>K. pneumoniae</i> | <i>K. pneumoniae</i> | 1 | NO | N/A |
| ARLG-4915 | Yes | KPC2 | YES | Positive | <i>K. pneumoniae</i> | <i>K. pneumoniae</i> | 1 | NO | N/A |
| ARLG-4916 | Yes | KPC2 | YES | Positive | <i>K. pneumoniae</i> | <i>K. pneumoniae</i> | 1 | NO | N/A |
| ARLG-4917 | Yes | KPC3 | NO  | Negative | <i>K. pneumoniae</i> | <i>K. pneumoniae</i> | 1 | NO | N/A |
| ARLG-4918 | Yes | KPC3 | NO  | Negative | <i>K. pneumoniae</i> | <i>K. pneumoniae</i> | 1 | NO | N/A |
| ARLG-4920 | Yes | KPC3 | NO  | Negative | <i>K. pneumoniae</i> | <i>K. pneumoniae</i> | 1 | NO | N/A |
| ARLG-4921 | Yes | KPC2 | YES | Positive | <i>K. pneumoniae</i> | <i>K. pneumoniae</i> | 1 | NO | N/A |
| ARLG-4922 | Yes | KPC2 | YES | Positive | <i>K. pneumoniae</i> | <i>K. pneumoniae</i> | 1 | NO | N/A |
| ARLG-4926 | No  | N/A  | NO  | Negative | <i>K. pneumoniae</i> | <i>K. pneumoniae</i> | 1 | NO | N/A |
| ARLG-4928 | Yes | KPC3 | NO  | Negative | <i>K. pneumoniae</i> | <i>K. pneumoniae</i> | 1 | NO | N/A |
| ARLG-4929 | Yes | KPC2 | YES | Positive | <i>K. pneumoniae</i> | <i>K. pneumoniae</i> | 1 | NO | N/A |
| ARLG-4930 | Yes | KPC3 | NO  | Negative | <i>K. pneumoniae</i> | <i>K. pneumoniae</i> | 1 | NO | N/A |
| ARLG-4932 | No  | N/A  | NO  | Negative | <i>K. pneumoniae</i> | <i>K. pneumoniae</i> | 1 | NO | N/A |

\*1 USA, 2 Central/Northern North America (Colombia/Nicaragua), 3 Southern South America (Argentina/Chile), 4 Asia-Pacific (Lebanon/Singapore).

\*\*1 Resolved KPC detection, 2 Persistent discrepancy, 3 Persistent identification score <2.0, 4 Resolved identification score ≥2.0
